1 **Two sides of a coin: a Zika virus mutation selected in pregnant rhesus macaques**  
2 **promotes fetal infection in mice but at a cost of reduced fitness in nonpregnant**  
3 **macaques and diminished transmissibility by vectors**

4

5 Danilo Lemos<sup>1</sup>, Jackson B. Stuart<sup>1</sup>, William Louie<sup>1</sup>, Anil Singapuri<sup>1</sup>, Ana L. Ramirez<sup>1</sup>, Jennifer  
6 Watanabe<sup>2</sup>, Jodie Usachenko<sup>2</sup>, Rebekah I. Keesler<sup>2</sup>, Claudia Sanchez-San Martin<sup>3</sup>, Tony Li<sup>3</sup>,  
7 Calla Martyn<sup>3</sup>, Glenn Oliveira<sup>4</sup>, Sharada Saraf<sup>4</sup>, Nathan D. Grubaugh<sup>4,5</sup>, Kristian G. Andersen<sup>4</sup>,  
8 James Thissen<sup>6</sup>, Jonathan Allen<sup>6</sup>, Monica Borucki<sup>6</sup>, Konstantin A. Tsetsarkin<sup>7</sup>, Alexander G.  
9 Pletnev<sup>7</sup>, Charles Y. Chiu<sup>3</sup>, Koen K. A. Van Rompay<sup>2</sup>, Lark L. Coffey<sup>1, #</sup>

10

11 <sup>1</sup> University of California, Davis, School of Veterinary Medicine, Department of Pathology,  
12 Microbiology and Immunology

13 <sup>2</sup> University of California, Davis, California National Primate Research Center

14 <sup>3</sup> University of California, San Francisco, Department of Laboratory Medicine

15 <sup>4</sup> The Scripps Research Institute

16 <sup>5</sup> Department of Epidemiology of Microbial Diseases, Yale School of Public Health

17 <sup>6</sup> Lawrence Livermore National Laboratory

18 <sup>7</sup> Laboratory of Infectious Diseases, National Institute of Allergy and Infectious Disease, National  
19 Institutes of Health

20 #Corresponding author

21 [lcoffey@ucdavis.edu](mailto:lcoffey@ucdavis.edu)

22

23 ORCID numbers:

24 Lark L. Coffey : 0000-0002-0718-5146

25 Koen K. A. Van Rompay: 0000-0002-7375-1337

26 Rebekah I. Keesler: 0000-0002-8559-3591

27 Jackson B. Stuart: 0000-0001-9577-1737

28 Charles Y. Chiu: 0000-0003-2915-2094

29 **ABSTRACT**

30 Although fetal death is now understood to be a severe outcome of congenital Zika syndrome,  
31 the role of viral genetics is still unclear. We sequenced Zika virus (ZIKV) from a rhesus  
32 macaque fetus that died after inoculation and identified a single intra-host mutation, M1404I, in  
33 the ZIKV polyprotein, located in NS2B. Targeted sequencing flanking position 1404 in 9  
34 additional macaque mothers and their fetuses identified M1404I at sub-consensus frequency in  
35 the majority (5 of 9, 56%) of animals and some of their fetuses. Despite its repeated presence in  
36 pregnant macaques, M1404I occurs rarely in humans since 2015. Since the primary ZIKV  
37 transmission cycle is human-mosquito-human, mutations in one host must be retained in the  
38 alternate host to be perpetuated. We hypothesized that ZIKV I1404 increases fitness in non-  
39 pregnant macaques and pregnant mice but is less efficiently transmitted by vectors, explaining  
40 its low frequency in humans during outbreaks. By examining competitive fitness relative to  
41 M1404, we observed that I1404 produced lower viremias in non-pregnant macaques and was a  
42 weaker competitor in tissues. In pregnant wildtype mice ZIKV I1404 increased the magnitude  
43 and rate of placental infection and conferred fetal infection, contrasting with M1404, which was  
44 not detected in fetuses. Although infection and dissemination rates were not different, *Ae.*  
45 *aegypti* transmitted ZIKV I1404 more poorly than M1404. Our data highlight the complexity of  
46 arbovirus mutation-fitness dynamics, and suggest that intrahost ZIKV mutations capable of  
47 augmenting fitness in pregnant vertebrates may not necessarily spread efficiently via  
48 mosquitoes during epidemics.

49

50

51 **IMPORTANCE**

52 Although Zika virus infection of pregnant women can result in congenital Zika syndrome,  
53 the factors that cause the syndrome in some but not all infected mothers are still unclear. We  
54 identified a mutation that was present in some ZIKV genomes in experimentally inoculated

55 pregnant rhesus macaques and their fetuses. Although we did not find an association between  
56 the presence of the mutation and fetal death, we performed additional studies with it in non-  
57 pregnant macaques, pregnant mice, and mosquitoes. We observed that the mutation increased  
58 the ability of the virus to infect mouse fetuses but decreased its capacity to produce high levels  
59 of virus in the blood of non-pregnant macaques and to be transmitted by mosquitoes. This study  
60 shows that mutations in mosquito-borne viruses like ZIKV that increase fitness in pregnant  
61 vertebrates may not spread in outbreaks when they compromise transmission via mosquitoes  
62 and fitness in non-pregnant hosts.

63

## 64 **INTRODUCTION**

65 Congenital Zika syndrome (CZS) caused by Zika virus (ZIKV) produces a disease  
66 spectrum that sometimes results in microcephaly or death in fetuses from mothers infected  
67 during pregnancy. In American outbreaks since 2015, about 15% of fetuses from ZIKV infected  
68 mothers displayed reduced growth, sensory disorders, and central nervous system  
69 malformations (1–6), manifestations of CZS (7–9). CZS abnormalities associate with detection  
70 of ZIKV RNA or infectious virus in amniotic fluid (AF) and fetal tissues, including brain (4–6, 10–  
71 14). Viral and host factors that affect the severity of CZS are still not well understood, including  
72 why some fetuses die or develop microcephaly while others do not.

73 Mutations in ZIKV that arise and spread in humans during outbreaks may contribute to  
74 CZS or modify transmission by mosquitoes. However, identifying mutations that could influence  
75 ZIKV phenotype is complicated as consensus (average nucleotide) genomes from febrile  
76 human cases in recent outbreaks differ by hundreds of nonsynonymous mutations compared to  
77 ancestral genomes (15). Any of these mutations alone or in combination could modify incidence,  
78 transmissibility, or pathogenesis. Furthermore, the consensus genomes from 1 miscarriage and  
79 7 microcephaly cases are interleaved with febrile genomes in phylogenies and share no  
80 common amino acid differences compared to febrile cases from patients living in the same

81 areas suggesting that no single mutation or group of mutations associate with the most severe  
82 CZS outcomes (16). Phylogenetic inference identified prM protein (prM-S139N) coding mutation  
83 that increases microcephaly in mice (17), although this finding was not reproducible in repeated  
84 studies (18). Another mutation identified via phylogenetic analysis, E-V473M, increased  
85 viremias in non-pregnant cynomolgus macaques and neurovirulence in 1-day old mice  
86 inoculated intracranially, but did modify ZIKV RNA levels in *Ae. aegypti* (19). Since prM-S139N  
87 and E-V473M are present in most genomes from American outbreaks since 2015, including in  
88 febrile women whose babies did not develop CZS, they are likely not major determinants of CZS  
89 outcome in pregnant women.

90 ZIKV evolution intrahost has been less studied than evolution across patients but may  
91 also affect disease outcome. Defining intrahost evolution over time necessitates repeated  
92 sampling. For pregnant women, sequencing ZIKV from even a single time is often unsuccessful,  
93 since viremia is frequently missed in the clinical setting (14, 20), and AF is rarely available given  
94 that amniocentesis can lead to iatrogenic infection (21) or ZIKV transmission to the fetus from  
95 an infected mother. Due to these limitations, the role of intrahost viral genetics in CZS remains  
96 unclear. To circumvent limited human sample availability or testing hundreds of mutations  
97 identified via phylogenetics as potential determinants of CZS, we used an experimental model  
98 to identify intrahost ZIKV mutations in infected pregnant rhesus macaques with known CZS  
99 outcomes.

100 Macaques have rapidly become an important model for understanding ZIKV infection  
101 and disease (22, 23, 32–34, 24–31) due to similar placentation, immunology, fetal  
102 organogenesis, and neurologic development with humans. Studies using rhesus macaques,  
103 including our own work (24, 35), have demonstrated fetal central nervous system lesions  
104 consistent with abnormal brain development observed in CZS. As in humans, not all rhesus  
105 macaque fetuses from mothers inoculated with the same ZIKV stock at similar gestational  
106 windows develop CZS. While host determinants certainly play a role, viral mutations developed

107 intrahost may also influence different CZS outcomes. Sub-consensus mutants in genetically  
108 heterogeneous populations of many other RNA viruses (36, 37, 46–51, 38–45) have been  
109 associated with modified transmissibility or disease outcomes. A wild type 2015 ZIKV strain  
110 from a febrile patient in Brazil showed augmented replicative success in human placental and  
111 neural cells compared to its genetically homogenous infectious clone derivative (16). This  
112 highlights that ZIKV mutants intrahost play a role in infection kinetics, even in cell monocultures.  
113 However, sub-consensus ZIKV mutations in an individual host are unrecognized without deep  
114 sequencing that characterizes the entire population of viral RNA genomes instead of solely the  
115 consensus. Intrahost ZIKV populations from 11 pregnant rhesus macaques revealed no *de novo*  
116 mutations in one study (51), although sequencing from maternal serum and AF was from just  
117 one time point post-inoculation.

118         In this study, we performed intrahost ZIKV sequencing in a rhesus macaque mother and  
119 her deceased fetus, and identified a single sub-consensus mutation, M1404I in the NS2B  
120 coding region. We then focused sequencing at position 1404 in 9 additional pregnant rhesus  
121 macaques and their fetuses where we found that it was present at a minority frequency in 5  
122 additional animals but not detectable or at ~1% frequency in the inoculum. Given its rise in  
123 frequency, we hypothesized that the mutant confers increased fitness in rhesus macaques and,  
124 by extension, other vertebrates. We therefore performed parallel infections of M1404 and I1404  
125 in non-pregnant rhesus macaques and pregnant mice as well as mixed infections of non-  
126 pregnant rhesus macaques. Since ZIKV is primarily mosquito-borne, viral genomes that evolve  
127 in vertebrates must be maintained in mosquitoes to persist in alternating vertebrate-mosquito-  
128 vertebrate cycling. To test this concept and to better understand why I1404 was detected at low  
129 frequency in humans during outbreaks despite increasing in frequency intrahost in pregnant  
130 rhesus macaques, we compared transmissibility of M1404 and I1404 by parallel infections of  
131 *Aedes aegypti* vectors.

132

133 **RESULTS**

134 **A ZIKV mutation arises *de novo* or increases in frequency in experimentally inoculated**

135 **pregnant rhesus macaques.** Pregnant rhesus macaques were ZIKV-inoculated to study viral

136 infection dynamics and CZS. Outcomes from those experiments are detailed in Coffey *et al.* and

137 Van Rompay *et al.* (24, 34). The rhesus macaques in those studies were inoculated in their first

138 or second trimesters of pregnancy intravenously (IV) and intraamniotically (IA) with  $1 \times 10^5$

139 plaque forming units (PFU) of ZIKV WT (SPH2015, a Brazilian strain, KU321639) or

140 subcutaneously (SC) with  $1 \times 10^3$  PFU of ZIKV Puerto Rico 2015 (KU501215) (**Figure 1**). Some

141 fetuses died pre-term while most survived to the end of the study, which was ~10 days pre-term.

142 To investigate intrahost dynamics we analyzed samples archived from those rhesus macaques

143 by deep sequencing. We first sequenced the complete ZIKV genome in amniotic fluid (AF) from

144 rhesus macaque #5388 whose fetus died 7 days post inoculation (dpi) and exhibited high ZIKV

145 RNA levels in multiple maternal and fetal tissues [23]. We identified no consensus (found in

146 >50% of RNA reads) mutations and only one sub-consensus (found in <50% of RNA reads)

147 mutation, G4315A, which occurred at 18% frequency. The G4315A mutation results in a non-

148 synonymous methionine (M) to isoleucine (I) substitution at amino acid position 1404 of the

149 ZIKV polyprotein (with reference to WT strain SPH2015, KU321639) and is located in the non-

150 structural protein 2B (NS2B), a co-factor for the flavivirus protease, NS3. Sequencing of the

151 inoculum by 2 different laboratories flanking the G4315A variant locus at 5,705 and 2,296-fold

152 revealed the mutant in 0.2% or 1.3% of the ZIKV RNA reads, respectively (**Supplemental Table**

153 **2**), at or below the reported error rates for short-read Illumina sequencing (52). We performed

154 additional sequencing to determine whether M1404I was also present in other maternal or fetal

155 tissues from rhesus macaque #5338 and also in 9 additional pregnant ZIKV-inoculated rhesus

156 macaques with different CZS outcomes using a targeted sequencing approach flanking 1404. In

157 addition to the AF where it was first detected, ZIKV M1404I was detected in the gestational sac,

158 amniotic membrane, placenta, and vagina of macaque #5388. ZIKV M1404I was also detected

159 at minority frequency in 4 additional pregnant rhesus macaques inoculated IV and IA with the  
160 WT Brazilian strain in multiple tissues including amniotic fluid, gestational sac, amniotic  
161 membrane, placenta, maternal vagina, fetal seminal vesicle, and maternal urine. M1404I was  
162 also detected in the spleen of one mother (#5731) inoculated SC with the isolate from Puerto  
163 Rico. The Puerto Rican ZIKV inoculum lacked the I1404 variant in any RNA reads sequenced at  
164 a coverage depth of 2,242-fold. The I1404 mutation was not detected in tissues from 4  
165 additional pregnant rhesus macaques in the same studies (**Supplemental Table 2**). Although  
166 the mutation was detected in 2 rhesus macaques whose fetuses died, it was also found in 4  
167 rhesus macaques whose fetuses survived to near-term, indicating it was not associated with  
168 fetal death. The *de novo* development of ZIKV M1404I and its increase in frequency from near-  
169 absence in the inoculum to presence within multiple tissues intrahost in six pregnant rhesus  
170 macaques inoculated by two routes with two different ZIKV strains suggested that M1404I may  
171 be a rhesus macaque adaptive mutation. To study the mutation in isolation, we generated  
172 infectious clone derived viruses that vary only at 1404 for comparative fitness experiments in  
173 cells, non-pregnant rhesus macaques, pregnant mice, and mosquitoes.

174  
175 **Growth kinetics of ZIKV I1404 are superior to M1404 in vertebrate cells.** We tested whether  
176 expression of ZIKV I1404 in cell culture modifies ZIKV growth kinetics relative to M1404. We  
177 generated two infectious clones identical in sequence except for position 1404. To do this, we  
178 modified a ZIKV infectious clone made from a 2015 Brazilian ZIKV isolate, Paraiba\_01/2015  
179 (16), to match the amino acid sequence of the Brazilian strain SPH2015. Strain SPH2015,  
180 hereafter termed 'WT', was isolated from a patient and passaged in cells before use in pregnant  
181 rhesus macaque studies. The sequences of clone-derived ZIKV, termed 'M1404' and 'I1404'  
182 based on the amino acid at polyprotein position 1404 were verified by Sanger sequencing (data  
183 not shown) using primers flanking the ZIKV genome (**Supplemental Table 1**). The relative  
184 growth kinetics measured as ZIKV RNA and infectious virus levels in supernatants of inoculated



185 cultures over time were assessed in African green monkey kidney (*Vero*) or *Ae. albopictus* larval  
186 (C6/36) cells (**Supplemental Figure 1**). ZIKV I1404 exhibited significantly higher ZIKV RNA  
187 levels compared to M1404 from 24 to 96 hours post inoculation (hpi) in *Vero* cells at a MOI of  
188 0.01 ( $p < 0.001$ , repeated measures ANOVA) (**Supplemental Figure 1A**). ZIKV RNA levels for  
189 both M1404 and I1404 were lower than for WT at all times studied, a pattern common to clone-  
190 derived viruses compared to WT progenitor viruses [16]. Even though the increase in ZIKV RNA  
191 kinetics was accelerated for I1404 compared to M1404, infectious ZIKV levels in *Vero* cells from  
192 24-96 hpi by plaque assay were not different between ZIKV M1404, I1404, and WT ( $p > 0.05$ ,  
193 repeated measures ANOVA) (**Supplemental Figure 1B**). In C6/36 mosquito cells, ZIKV RNA  
194 levels after inoculation at a MOI of 0.5 were not different across groups at any time from 24-96  
195 hpi ( $p > 0.05$ , repeated measures ANOVA) (**Supplemental Figure 1C**). These results indicate  
196 that in a standard vertebrate cell line, the I1404 mutation detected in pregnant rhesus macaques  
197 increases ZIKV RNA levels and infection kinetics compared to the progenitor M1404, although it  
198 does not change the levels of infectious virus.

199

200 **ZIKV I1404 displays reduced fitness in non-pregnant rhesus macaques inoculated with**  
201 **an equal mixture of M1404 and I1404.** To directly compare the relative fitness of M1404  
202 versus I1404, we performed a competition experiment wherein both viruses were inoculated  
203 together at equal ratios into two non-pregnant rhesus macaques (**Figure 2A**). Rhesus  
204 macaques were also inoculated with ZIKV WT or ZIKV I1404 alone for comparison. ZIKV  
205 M1404 was not included since its coding amino acid sequence is identical to WT to reduce  
206 macaque use. We defined fitness as the plasma viremia magnitude and kinetics and, for mixed  
207 infections, the relative abundance of ZIKV RNA reads encoding M1404 or I1404 in plasma and  
208 tissues. Rhesus macaques inoculated with ZIKV WT or the 1:1 mixture of M1404 and I1404  
209 exhibited similar kinetics ( $p = 0.474$ , unpaired t-test) with peak viremias at 5-7 dpi that reached  
210  $10^6$ - $10^7$  ZIKV genomes/ml plasma (**Figure 2B**) with no differences in the viremia area under the

211 curve (AUC) (**Figure 2C**). By contrast, rhesus macaques inoculated with ZIKV I1404 developed  
212 significantly lower peak viremias,  $10^2$  ZIKV genomes/mL plasma, that endured for a significantly  
213 shorter period of time and showed lower AUC ( $p=0.03$ , AUC) compared to the other two groups.  
214 Despite reduced magnitude and kinetics of viremia, most tissue ZIKV levels were not different in  
215 animals infected with I1404, WT, or the 1:1 mixture (**Figure 2D**). The I1404 mutant did not  
216 revert to M1404 in the spleen or mesenteric lymph node of either I1404-inoculated animal at  
217 levels detectable by Sanger sequencing (data not shown). Targeted deep sequencing flanking  
218 the 1404 locus in rhesus macaques inoculated with the 1:1 mixture detected ZIKV I1404 at a  
219 significantly lower frequency than M1404 in plasma, spleen, ileum, mesenteric, and inguinal  
220 lymph nodes ( $p<0.001$ , Chi-squared tests) (**Figure 2E, Supplemental Table 3**). Despite the  
221 repeated detection of ZIKV I1404 in pregnant rhesus macaques, these experiments show that  
222 I1404 reduces viral fitness relative to M1404 in non-pregnant rhesus macaques. Given that  
223 pregnant rhesus macaques studies are labor intensive and costly, we therefore explored  
224 whether fitness advantages conferred by I1404 may be specific to pregnancy using pregnant  
225 mice.

226

227 **ZIKV I1404 confers fetal infection in pregnant CD-1 mice.** To assess whether I1404 provides  
228 a fitness benefit in pregnancy, we inoculated pregnant CD-1 mice intraperitoneally, similar to an  
229 established model (53), with ZIKV WT, M1404, I1404, or diluent, and compared ZIKV RNA  
230 levels in maternal and fetal tissues and fetal weights and resorption rates (**Supplemental**  
231 **Figure 2**). Dams were euthanized on gestation day 13 (E13, where full term in mice is E21) in  
232 experiment 1 and on E13 or E19 in experiment 2 (**Figure 3A**). Back titration of residual inocula  
233 (**Figure 3B**) showed that mice were administered similar RNA levels of ZIKV M1404 and I1404  
234 for both experiments. The WT inoculum (experiment 1 only) was lower. No statistically  
235 significant differences in rates of fetal resorption or fetal weight were observed in either  
236 experiment or at either gestation day ( $p>0.05$ , Fishers' exact tests for resorption rates,  $p>0.05$

237 for mean weights compared with ANOVA multiple comparisons) (**Supplemental Figure 2A-D**).  
238 On E13, mean maternal spleen ZIKV RNA levels for WT were significantly higher than for  
239 M1404-inoculated mice ( $p=0.02$ , two-way ANOVA) (**Figure 3C**) but no significant differences in  
240 rates of ZIKV detection or mean RNA levels in placentas were observed across the 3 ZIKV  
241 inoculated groups ( $p>0.05$ , two-way ANOVA) (**Figure 3D**). Despite similar ZIKV RNA levels in  
242 placentas, ZIKV RNA was only detected in fetuses in the ZIKV 1404I group (1404I : 9/43 [20%]  
243 versus 1404M : 0/43 [0%],  $p=0.003$ , Fisher's exact test) (**Figure 3E**). These fetuses were from 7  
244 different mothers. Sanger sequencing from 3 ZIKV RNA positive fetuses from different mothers  
245 in the I1404-inoculated group at E13 showed retention of I1404 in 1 fetus and reversion to  
246 M1404 in the other 2; for one mother/fetus pair the reversion was detected only in the fetus and  
247 not in the maternal spleen or placenta (**Figure 3F**). At E19, the magnitude of mean ZIKV RNA  
248 levels in spleens and the rates and magnitude of mean ZIKV RNA levels in placentas were  
249 significantly higher in mice infected with I1404 than M1404 (levels:  $p<0.01$  for spleen,  $p<0.001$   
250 for placenta, one-way ANOVA, placenta infection rates: I1404: 10/20 [50%] versus M1404: 2/20  
251 [10%],  $p=0.01$ , Fisher's exact test) (**Figure 3G-H**). Only 1 E19 fetus head but no fetal bodies in  
252 the I1404 group tested ZIKV RNA positive (**Figure 3 I-J**) (rates not significantly different,  
253 Fisher's exact test). Depending on the time of tissue collection, these data show that I1404  
254 confers a fitness advantage in pregnancy by increasing the magnitude and rate of fetoplacental  
255 infection during murine gestation.

256

257 **ZIKV I1404 mutant is more poorly transmitted than M1404 by *Aedes aegypti*.** Given that  
258 fitness modifying mutations evolved by arboviruses in one host must necessarily be maintained  
259 in the alternate host for the virus to persist via arthropod-borne cycling in nature, we next  
260 considered whether ZIKV I1404 affects transmission by the primary vector, *Ae. aegypti*.  
261 Mosquitoes were presented to viremic *Ifnar<sup>-/-</sup>* mice infected with ZIKV M1404 or I1404 (**Figure**  
262 **4A**). Engorged mosquitoes were held for 7 days after ingesting blood from mice that had

263 matched ZIKV RNA levels (**Figure 4B**) and then dissected and assayed to measure rates and  
264 levels of ZIKV RNA in bodies (for infection), legs and wings (disseminated infection), and saliva  
265 (a proxy for transmission). The 7-day incubation period was chosen since it represents the time  
266 at which ZIKV exposed mosquitoes exhibit maximal infection rates (54). All *Ae. aegypti* that  
267 ingested viremic mouse blood became infected and mean ZIKV RNA levels between groups of  
268 mosquito bodies were not different (not significant,  $p > 0.05$ , unpaired t-test) (**Figure 4C**).  
269 Although all mosquitoes also developed disseminated infections in legs and wings, the mean  
270 ZIKV RNA level was significantly higher for the I1404 cohort compared to M1404 cohort  
271 ( $p < 0.007$ , unpaired t-test) (**Figure 4D**). Despite higher dissemination titers, *Ae. aegypti*  
272 transmitted ZIKV I1404 more poorly than M1404 (I1404: 3/20 [15%] versus M1404: 13/20 [65%],  
273  $p = 0.003$ , Fisher's exact test) (**Figure 4E**). Sanger sequencing of three ZIKV saliva samples  
274 from mosquitoes in each group showed retention of the amino acid at 1404 (data not shown).  
275 This mosquito data revealed that ZIKV I1404 is less transmissible than M1404 in the primary  
276 vector.

277

## 278 **DISCUSSION**

279 Understanding factors that influence disease and transmissibility can lead to approaches  
280 to control ZIKV. We identified a ZIKV mutation, M1404I, that arose *de novo* or increased in  
281 frequency in experimentally inoculated pregnant rhesus macaques. Repeated detection of the  
282 mutation in tissues of multiple pregnant rhesus macaques at higher frequency than in the  
283 inoculum suggests it confers a selective advantage intrahost in pregnancy. Our experiments in  
284 mice confirm that I1404 increases ZIKV fitness in pregnancy by augmenting the magnitude and  
285 rate of placental infection and by conferring fetal infection in pregnant CD-1 mice inoculated  
286 intraperitoneally in the first trimester. By contrast, our studies in non-pregnant rhesus macaques  
287 show that I1404 is less fit than M1404, producing significantly lower viremias and decreased  
288 frequency in tissues starting from an equal ratio via mixed inoculation. The observation of

289 inferior fitness of I1404 compared to M1404 in non-pregnant rhesus macaques parallels its low  
290 frequency in non-pregnant humans where only 5 of 543 (<1%) of publicly available ZIKV  
291 consensus genomes as of August 2020 ([https://nextstrain.org/zika?c=gt-NS2B\\_32](https://nextstrain.org/zika?c=gt-NS2B_32)) possess the  
292 I1404 allele (1 of the 5 was from a microcephalic fetus). We also observed that ZIKV I1404 is  
293 not as efficiently transmitted by *Ae. aegypti*, which may further explain its low frequency in  
294 recent ZIKV outbreaks where the most common transmission route was human-mosquito-  
295 human.

296         The kinetics of and mechanisms by which I1404 increases ZIKV infection of placental  
297 and fetal tissues in murine pregnancy merit further study. Although I1404 enhanced fetoplacental  
298 infection, reversion to wild type M1404 in some infected fetuses on at gestation day  
299 E13 suggests that M is the preferred amino acid in some tissues. Detection of ZIKV RNA in 20%  
300 of I1404 fetuses at E13 but only 5% of fetal heads and no fetal bodies on E19 also raises new  
301 questions. The disparity in fetal infection rate between E13 and E19 is likely not related to the  
302 pregnant mice deriving from different cohorts since the same rates were observed across the  
303 E13 fetuses from both experiments where the cohorts of mothers were different. Clearance or  
304 reduction in fetal infection below the limit of detection of our qRT-PCR assays between E13 and  
305 E19 is a possibility, and may reflect a difference in timing of maximum ZIKV levels, where fetal  
306 infection may peak earlier than placental infection. Defining the kinetics of fetal or placental  
307 ZIKV RNA levels over time is difficult to assess experimentally since evaluating infection  
308 involves destroying the fetus or placenta. It is also possible that since ZIKV I1404 infects fetuses  
309 at low rates, with the variable rate from experiment 1 to 2 representing a stochastic effect. ZIKV  
310 infects many placental cell types including trophoblasts, endothelial cells, fibroblasts, and fetal  
311 macrophages (55, 56), as well as multiple additional fetal cell types (24, 56–59). ZIKV I1404  
312 may also confer infection of certain of these cell targets or augment escape from their antiviral  
313 responses in ways that M1404 cannot.

314           The 1404 locus is in the NS2B coding region, which encodes a 130 amino acid protein  
315 that acts as a co-factor for NS3, the protease. Relative to other flaviviral proteins, the function(s)  
316 of NS2B are poorly understood. NS2B consists of 3 transmembrane domains (TMD) (60, 61).  
317 Mutations in the NS2B TMD decrease yellow fever virus replication (62) and can modify virus  
318 assembly of Japanese encephalitis virus (60). The 1404 mutant identified in this study is located  
319 within NS2B TMD pass 2. Nuclear magnetic resonance of dengue virus NS2B indicates that  
320 TMD-TMD interactions might promote membrane fluidity or facilitate interactions with other  
321 flavivirus proteins (61). Future studies could focus on sub-cellular changes in virus-virus or  
322 virus-cell interactions mediated by M1404I that might impact cell tropism, infectivity, and  
323 immune responses.

324           Here we employed experimental infection of non-pregnant macaques, pregnant mice,  
325 and vector mosquitoes to study fitness of a ZIKV mutation we initially identified in pregnant  
326 rhesus macaques (**Figure 5**). The data from this study support the idea that viruses do not  
327 necessarily evolve to become more infectious or virulent, especially if those traits reduce  
328 transmissibility. Despite increasing in frequency in pregnant macaques and conferring infection  
329 of fetal mice, our data show that the I1404 mutant identified in pregnant rhesus macaques is  
330 less transmissible by vectors, as measured by lower ZIKV RNA transmission rates in saliva  
331 capture assays, and also less capable of generating viremias in non-pregnant rhesus macaques  
332 sufficient to infect feeding vectors. Although higher levels or longer periods of viremia in  
333 pregnant macaques may result from fetoplacental 'spill-back' to the mother, a pattern we  
334 anecdotally observed in viremic pregnant rhesus macaques whose fetuses died and were  
335 removed via fetectomy and then became aviremic several days later, fetal infection is generally  
336 considered a transmission 'dead-end' for arboviruses. As such, arboviral mutations that  
337 augment fetal infection also need to be neutral or fitness-enhancing in mosquitoes to persist in  
338 human-mosquito-human cycling. Since we observed decreased fitness in vectors, the M1404I  
339 mutation identified in this study is not likely to spread in human-mosquito-human transmission in

340 ZIKV outbreaks. A unique feature of this study was use of two vertebrate models of ZIKV  
341 disease as well as vector competence assays. The combined data from these three systems  
342 underscores the importance of investigating consequences of arboviral mutation in both  
343 vertebrates and invertebrates, to fully understand their roles in outbreak spread (63).

344

## 345 **MATERIALS AND METHODS**

346

### 347 ***Rhesus macaques***

348 Details for the studies with pregnant rhesus macaques are described elsewhere (24, 34). For  
349 non-pregnant animals, healthy male or female rhesus macaques (*Macaca mulatta*) were used in  
350 this study. All rhesus macaques were born at the California National Primate Research Center  
351 (CNPRC). Animals #5123, 5779, 5606, and 5730 received an HIV envelope protein as part of  
352 another study, but were never challenged with HIV. Prior to ZIKV inoculation, animals were  
353 housed indoors in stainless steel cages, and exposed to a 12h light/dark cycle, 18-23°C, and  
354 30-70% room humidity. Rhesus macaques were provided with water *ad libitum* and received  
355 commercial chow a high protein diet commercial chow and fresh fruit supplements. Macaques  
356 were observed at least twice daily for clinical signs of disease including inappetence, stool  
357 quality, dehydration, diarrhea, and lethargy, and were given supportive care (including  
358 nutritional supplements) as needed. Clinical signs were rare and mild.

359

### 360 ***Mice***

361 Timed pregnant CD-1 mice were purchased from Charles River Laboratories (Sacramento, CA).  
362 Animals were housed in a BSL-3 facility at University of California, Davis, prior to any  
363 procedure. A maximum of 4 dams were caged together at each time, with 12 hour light/dark  
364 cycle, 18-23°C, 30-70% room humidity, social enhancers and access to mouse chow and water

365 *ad libitum*. Non-pregnant 2 month old female *lfnar1* ( $\text{IFN-}\alpha/\beta\text{R-/-}$ ; C57BL/6, B6.129S2-  
366 *lfnar1tm1Agt/Mmjax*, The Jackson Laboratory) were used as bloodmeal sources for vector  
367 competence studies. Mice were anesthetized prior to mosquito exposure with a mixture of  
368 ketamine (VETone Zetamine CIII, 75 mg/kg), xylazine (AnaSed, 10 mg/kg), and acepromazine  
369 (AceproJect, 1 mg/kg) solution administered intraperitoneally. Immediately after mosquito feeds,  
370 mice were euthanized while still under anesthesia via exsanguination using cardiac puncture  
371 followed by cervical dislocation.

372

### 373 **Animal Use**

374 The University of California, Davis is accredited by the Association for Assessment and  
375 Accreditation Laboratory Animal Care International (AAALAC). Animal care was performed in  
376 compliance with the 2011 Guide for the Care and Use of Laboratory Animals provided by the  
377 Institute for Laboratory Animal Research and both rhesus macaque and mouse studies were  
378 approved by the Institutional Animal Care and Use Committee (IACUC) of the University of  
379 California, Davis. All mouse procedures were approved under protocol #19404. All rhesus  
380 macaque procedures were approved under protocols #19211 and 19695.

381

### 382 **Mosquitoes**

383 The fourth generation of *Aedes aegypti* originally collected in 2015 in Puerto Rico were used in  
384 this study. Mosquitoes were maintained in a colony in an insectary at the University of  
385 California, Davis. Twenty four hours prior to exposure to a mouse, mosquitoes were transferred  
386 into pint cartons and transported into to a BSL-3 facility to acclimate in a humidified chamber set  
387 to a 12 hour light/dark cycle, 27°C, 80% humidity. After ingestion of blood from viremia ZIKV  
388 infected mice, mosquitoes were presented with 10% sucrose *ad libitum*.

389



390 **Cell lines**

391 African green monkey kidney cells (Vero; ATCC CCL-81) were cultured at 37°C in 5% CO<sub>2</sub>  
392 cultured in Dulbecco's Modified Eagle Medium (DMEM, Gibco, Thermo Fisher Scientific)  
393 supplemented with 2% fetal bovine serum FBS (Gibco, Thermo Fisher Scientific) and 1%  
394 penicillin/streptomycin (Gibco, Thermo Fisher Scientific). Baby hamster kidney cells (BHK21;  
395 ATCC CCL-10) were cultured in the same conditions as Vero cells but supplemented with 10%  
396 FBS. *Aedes albopictus* cells (C6/36; ATCC CRL-1660) were cultured in Schneider's insect  
397 medium (Caisson Labs) supplemented with 20% FBS and 1% P/S at 28°C and atmospheric  
398 CO<sub>2</sub>.

399

400 **Viruses**

401 ***Wild type Zika virus stock***

402 For growth curves and *in vivo* experiments in pregnant and non-pregnant rhesus macaque and  
403 pregnant mice, the 2015 Brazilian ZIKV strain SPH2015 (Genbank accession number  
404 KU321639) was used. This virus was originally isolated from a human transfusion recipient in  
405 São Paulo, Brazil and then passaged 3 times in Vero cells. We refer to this strain as wildtype  
406 (WT) throughout the paper. A 2015 Puerto Rico ZIKV strain PRVABC59 (Genbank accession  
407 number KU501215.1, Vero passage 4) was also used in pregnant rhesus macaque that were  
408 sequenced for this project. We refer to this strain as 'ZIKV Puerto Rico 2015' throughout the  
409 paper.

410

411 ***Generation of infectious clone derived M1404 and I1404 Zika viruses***

412 To focus on the 1404 locus as a determinant of phenotype, we generated 2 infectious clones  
413 that were identical in sequence except for at 1404. To start, we modified a ZIKV infectious clone  
414 made from the sequence of a 2015 Brazilian ZIKV strain, Paraiba\_01/2015 (16) to match the  
415 amino acid sequence of WT (SPH2015), which encodes M1404. Six mutations were inserted

416 into the Pariaba\_01/2015 clone at positions V313I, Y916H, V1143M, H1857Y, I2295M and  
417 I2445M of the ZIKV polyprotein to generate the WT amino acid sequence of strain SPH2015.  
418 We refer to this clone as 'ZIKV M1404'. Next the M1404 clone was mutated to change the  
419 amino acid at 1404 from G>A (AUG [methionine] > AUA [isoleucine]) to generate the I1404  
420 clone. The ZIKV I1404 clone is identical to the M1404 clone except at NS2B locus 1404. Each  
421 of the mutagenized loci were verified by Sanger sequencing. Infectious viruses were rescued  
422 from ZIKV M1404 and I1404 clones by electroporating plasmid DNA into BHK cells. 2.5µg of  
423 plasmid DNA was electroporated at 110V, 1750uF capacitance, and no resistance using an  
424 ECM 630 electro cell manipulator (BTX Harvard Apparatus) into ~50% confluent T75 flasks of  
425 BHK21 cells. Cells were then centrifuged for 5 minutes at 1500 revolutions per minute (RPM)  
426 and resuspended in DMEM in T25 flasks for 3 days of incubation at 37°C with 5% CO<sub>2</sub>. After 3  
427 days, the supernatant was collected, spun at 1500 RPM for 5 minutes to remove cell debris, and  
428 stored at -80°C in 400µL aliquots. These recovered infectious clone derived viruses, termed  
429 ZIKV M1404 and ZIKV I1404 were used in growth curves, mosquito, pregnant mouse and non-  
430 pregnant rhesus macaque experiments. The genotypic integrity of both infectious clone derived  
431 viruses was verified by whole-genome Sanger sequencing from the electroporation-harvested  
432 stocks.

433

#### 434 ***Zika virus titrations using plaque assays***

435 Infectious ZIKV from electroporation-rescued stocks of infectious clone-derived viruses, inocula,  
436 growth curves, mosquito saliva, and RT-qPCR positive mouse fetuses were titrated using  
437 plaque assays. Plaque assays were performed in confluent 6-well plates of Vero cells that were  
438 inoculated with 250µL of ten-fold dilutions of virus stock or sample resuspended in 2% FBS  
439 DMEM. Cells were incubated for 1 hour at 37°C and 5% CO<sub>2</sub> and plates were rocked every 15  
440 minutes to prevent cell death due to desiccation. After 1 hour, 3 mL of 0.5% agarose mixed with  
441 2% FBS/DMEM was added to each well to generate a solid agar plug. The cells were then

442 incubated for 7 days at 37°C and 5% CO<sub>2</sub>. After 7 days, the cells were fixed with 4% formalin for  
443 30 minutes, the agar plugs were removed, and the cells were stained with 0.025% crystal violet  
444 in 20% ethanol in order to visualize and quantify plaques. Samples were tested in duplicate and  
445 the average titer is reported as the number of plaques visible against a white background. The  
446 limit of detection was 40 plaque-forming units (PFU).

447

#### 448 ***Zika virus RNA isolation***

449 ZIKV RNA was isolated using MagMax (Thermo Fisher) or Qiazol (Qiagen). The MagMax  
450 system was used to extract ZIKV RNA from growth curve supernatants, rhesus macaque  
451 plasma, and homogenized mosquito bodies, legs and wings, and saliva. The MagMax Viral  
452 RNA Extraction Kit was used according to manufacturer's recommendations. For cell  
453 supernatant and mosquito homogenates, a total of 100 µL of sample was extracted and for  
454 rhesus macaque plasma the volume extracted was 300 µL. Maternal spleens, placentas and  
455 fetuses from the mouse experiments and solid tissues from rhesus macaque were extracted  
456 using Qiazol. Tissues stored in RNAlater were first removed from that solution prior to RNA  
457 extraction. Using clean forceps and scissors, tissues were removed from RNAlater, and a  
458 portion between 20-50 mg was cut and placed in a pre-weighed tube containing a 0.5 mm glass  
459 ball bearing (Fisher). Tubes were then re-weighed and 900 µL of Qiazol solution was added  
460 before trituration in a TissueLyzer (Retsch) machine. Tissues were homogenized for 2 m at 30  
461 shakes/second (s). If liquefaction of tissues was incomplete, samples were homogenized for an  
462 additional 2 m at 30 shakes/s. The homogenate was centrifuged for 2 m at 14,000 g to clarify  
463 the supernatant, which was tested. Viral RNA from homogenates were extracted following the  
464 manufacturer's kit instructions. The Qiazol protocol was modified for the E19 fetuses since they  
465 were large. E19 fetus samples were homogenized in 1 mL of DMEM and 200 µL of the  
466 homogenate was added to 900 µL of lysis reagent, after which the protocol followed the

467 manufacturer's instructions. All RNA extracts were eluted in 60µL of Qiagen elution buffer and  
468 archived at -80°C until further analysis.

469

#### 470 ***Zika virus RNA quantification by qRT-PCR***

471 ZIKV RNA samples were each measured in triplicate on an Applied Biosystems ViiA 7 machine  
472 using a Taqman Fast Virus 1-Step MasterMix (Thermo Fisher) with primers ZIKV 1087 forward  
473 (CCGCTGCCCAACACAAG), ZIKV 1163c reverse (CCACTAACGTTCTTTTGCAGACAT), and  
474 ZIKV 1108-FAM probe (AGCCTACCTTGACAAGCAGTCAGACACTCAA) according to the  
475 protocol in Lanciotti *et al.* (64). The protocol was modified by increasing the initial volume of  
476 sample tested to 9.6 µL to increase sensitivity. Samples were only considered positive if all  
477 three replicates yielded at detectable cycle threshold (Ct) value of less than the cutoff of the  
478 assay, 40. For each 96-well plate where samples were tested, a standard curve was generated  
479 from serial dilutions of a synthetic DNA of known concentration corresponding to the qRT-PCR  
480 target region. The reported limit of detection (LOD) on each graph shows the mean of all  
481 samples with a detectable Ct that are included in the graph. Where means are reported for a  
482 group of measurements, samples with no detectable ZIKV RNA were included in measurements  
483 where their values were reported at the LOD.

484

#### 485 ***In vitro Zika virus growth assays***

486 Vero and C6/36 cells were inoculated in triplicate with ZIKV M1404, I1404 or WT at a multiplicity  
487 of infection (MOI) of 0.01 (Vero only) or 0.5. Cells in one well in the plate were counted  
488 immediately prior to infection and the MOI was adjusted according to the cell count. The cells  
489 were inoculated by overlaying 150 µL of virus for 1 hour at 37°C in 5% CO<sub>2</sub> for Vero and 28°C in  
490 ambient CO<sub>2</sub> for C6/36 with gentle rocking every 15 minutes. After 1 hour, the cells were  
491 washed three times with phosphate buffered saline (PBS) to remove residual unbound viruses,  
492 and 2 mL/well of DMEM was added. At time points 0, 12, 24, 48, 72, and, for Vero, 96 hpi

493 (hours post inoculation) 160  $\mu$ L/well was collected and archived at  $-80^{\circ}\text{C}$  until it was tested in  
494 triplicate to determine ZIKV RNA levels by qRT-PCR. Data shown are the percent of the mean 0  
495 hpi residual input ZIKV RNA in genomes/ml. Each data point shows the mean measurement  
496 from 3 wells that were each measured in triplicate by qRT-PCR.

497

#### 498 ***Experimental inoculation of non-pregnant rhesus macaques with Zika virus***

499 Studies with pregnant rhesus macaques were described elsewhere [23,33]. Non-pregnant  
500 female and male rhesus macaques were inoculated subcutaneously or intravenously with 1 mL  
501 of ZIKV WT at  $1 \times 10^4$  PFU, a 1:1 mixture of ZIKV M1404 and I1404, where  $1 \times 10^3$  PFU of each  
502 virus was in the inoculum, or  $2 \times 10^3$  PFU of ZIKV I1404. All inocula were back-titrated  
503 immediately after inoculation without freezing using plaque assays to verify the administered  
504 doses. All inocula were re-sequenced to verify identity at the 1404 locus. The mixed inoculum  
505 was also checked prior to inoculation by next generation sequencing flanking the 1404 locus  
506 and was verified to contain 49% M1404 and 51% I1404. Urine and blood were collected from  
507 rhesus macaques daily for 7 days and then every other day until 14 dpi. Macaques were  
508 anesthetized with ketamine hydrochloride (10 mg/kg) and samples were processed according to  
509 previously described methodologies (34). At 14 dpi, rhesus macaques were euthanized and  
510 necropsied. During necropsies, tissues were grossly evaluated *in situ*, and then excised using  
511 forceps and then dissected with disposable razor blades to minimize cross-contamination.  
512 Tissues were either snap frozen by immersion in liquid nitrogen or stored in RNAlater solution.  
513 RNAlater samples were held at  $4^{\circ}\text{C}$  for 24 hours then transferred to  $-80^{\circ}\text{C}$  for further analysis.

514

#### 515 ***Experimental inoculation of pregnant mice with Zika virus***

516 Two ZIKV experiments were performed with pregnant mice. Numbers of mice are shown in  
517 figures. For both experiments, mice were sedated with isoflurane and inoculated  
518 intraperitoneally with 100  $\mu$ L of  $1 \times 10^5$  PFU of ZIKV WT, M1404, I1404, or DMEM on gestation

519 day 6 (E6). Inocula doses were verified by qRT-PCR. All mice in experiment 1 and some in  
520 experiment two were euthanized on E13, where full term is 21 days. Some mice in experiment  
521 two were euthanized later, at E19. After inoculation, mice were monitored twice daily by visual  
522 observation. On E13 or E19, mice were sedated with isoflurane and euthanized by cervical  
523 dislocation. Uterine horns were exposed and visually observed for viable or aborted/resorbed  
524 fetuses. The maternal spleen was excised and cut in half. Half was placed in a 2 mL tube  
525 containing 1 mL of RNAlater and the other half was stored in a 2 mL tube with 1 mL of DMEM.  
526 Placentas were collected in 2 mL tubes containing 1 mL of DMEM. Fetuses were weighed and  
527 their length was measured, and then they were collected in a 2 mL tube containing 1 mL of  
528 DMEM. Between each dam, forceps and scissors were immersed in 10% bleach and then 70%  
529 ethanol solution to minimize cross-contamination across animals. Samples in DMEM were  
530 immediately stored at -80°C. Samples in RNAlater were stored at 4°C for 24h and then  
531 transferred to -80°C until further analysis.

532

### 533 ***Experimental vector competence of Zika virus in Aedes aegypti***

534 Ifnar1<sup>-/-</sup> C57BL/6 mice were intraperitoneally inoculated with 1x10<sup>5</sup> PFU of ZIKV WT, M1404 or  
535 I1404 two days prior to presentation to female *Ae. aegypti* mosquitoes. Mice were anesthetized  
536 prior to mosquito presentation with a ketamine (75 mg/kg), xylazine (10 mg/kg) and  
537 acepromazine (1 mg/kg) solution administered intraperitoneally. Viremic mice were presented to  
538 sugar deprived mosquitoes for 1 hour. After 1 hour, mouse blood was collected to measure  
539 ZIKV RNA levels immediately after mosquito feeding. Mice were then euthanized by cervical  
540 dislocation. Engorged female mosquitoes were sorted from non-fed individuals by visual  
541 examination and then held for 7 days. On day 7, mosquitoes were cold anesthetized for 3-5  
542 minutes at -20°C and then their legs and wings were removed with forceps while immobilized on  
543 ice. Saliva was collected by inserting the proboscis into a glass capillary tube containing FBS for  
544 30 minutes. Mosquito bodies, legs and wings, and saliva including the capillary were placed into

545 2 mL tubes containing 250  $\mu$ L of DMEM and a glass bead (Fisher). Samples were immediately  
546 archived at  $-80^{\circ}\text{C}$  for further analysis. After thawing, mosquito samples were homogenized for 2  
547 m at 30 shakes/second (s) in a TissueLyzer. The homogenate was centrifuged for 2 m at 14,000  
548 g to clarify the supernatant, which was tested

549

### 550 ***Zika virus sequencing and sequence analyses***

551 Plasmid sequences of infectious clones and identities of virus stocks as well as selected  
552 samples from mice and mosquitoes were verified by Sanger sequenced using primers flanking  
553 the entire genome or 1404 (**Supplemental Table 1**). Extracted RNA samples were amplified  
554 using a Qiagen One-Step RT-PCR kit and forward primer: AGCTGTTGGCCTGATATGCG with  
555 reverse primer: AGCTGCAAAGGGTATGGCTA. The cycling conditions were as follows:  $50^{\circ}\text{C}$   
556 for 30 min,  $95^{\circ}\text{C}$  for 15 min, 40 cycles of  $94^{\circ}\text{C}$  for 1 min,  $57^{\circ}\text{C}$  for 1 min,  $72^{\circ}\text{C}$  for 1 min,  
557 followed by  $72^{\circ}\text{C}$  for 10 min and  $4^{\circ}\text{C}$  hold. Samples were sequenced at the University of  
558 California, Davis Sequencing core facility. Chromatograms were visualized and sequences were  
559 called using Sequencher (GeneCodes). The complete ZIKV genome from the inoculum and  
560 samples from pregnant rhesus macaques 5338 whose fetus died 7 dpi was sequenced at both  
561 the University of California, San Francisco using an established protocol (65) and Lawrence  
562 Livermore National Laboratories using a different established protocol (66). All other rhesus  
563 macaques and other samples in this study were sequenced using a different next generation  
564 sequencing protocol that was previously described (67, 68) and adapted here to flank 1404.  
565 After viral RNA isolation using Qiazol and RNA quantification by qRT-PCR, at least 1000  
566 genome copies/sample were used to generate libraries for sequencing. 5  $\mu$ L of ZIKV RNA was  
567 used in a cDNA synthesis reaction with a SuperScript IV kit (Invitrogen) in addition to 6  $\mu$ L of  
568 nuclease free water, 1  $\mu$ L of 10mM dNTP mix and 1  $\mu$ L of random hexamers. The mixture was  
569 heated to  $70^{\circ}\text{C}$  for 7 minutes and placed immediately on ice. A new mixture containing 4  $\mu$ L of  
570 5x SSIV (SuperScript IV) buffer with 1  $\mu$ L of 100 mM DTT, 1  $\mu$ L of RNase inhibitor and 1  $\mu$ L of

571 SSIV reverse transcriptase was added and the cDNA synthesis occurred at thermocycler  
572 conditions of 23°C for 10 min, 50°C for 45 min, 55°C for 15 min, 80°C for 10 min and 4°C until  
573 further use. Position 1404 was amplified using 1 µL each of 10 µM of forward primer:  
574 CCCTAGCGAAGTACTCACAGCT, reverse primer: TACACTCCATCTGTGGTCTCCC, 2.5 µL of  
575 cDNA, 15 µL of nuclease-free water, 0.5 µL of Q5 High Fidelity DNA Polymerase (New England  
576 Biolabs), 1 µL of 10mM dNTPs and 5 µL of 5x Q5 reaction buffer followed by 98°C for 30 s,  
577 95°C for 15 s, 65°C for 5 min, then repetition of steps 2 and 3 for 34 additional cycles and then  
578 a hold at 4°C until further use. PCR products were purified using Agencourt Ampure XP  
579 magnetic beads (Beckman Coulter) at a 1.8:1 ratio of beads to sample. Sequencing libraries  
580 were next generated using a Kapa Hyper prep kit (Roche). Specifically, ends were repaired by  
581 mixing 1.75 µL of end-repair and A-tailing buffer, 0.75 µL of end-repair A-tailing enzyme mix,  
582 and 12.5 µL of amplified DNA followed by incubation at 20°C for 30 m, then 65°C for 30 min.  
583 For adaptor ligations, 2.5 µL of 250 nM of NEXTflex Dual-Index DNA barcodes (Bioo Scientific)  
584 were used with 15 µL of end-repair reaction product, 2.5 µL of DNA ligase and 7.5 µL of ligation  
585 buffer incubated at 20°C for 15 min. This procedure was followed by a post-ligation cleanup  
586 using Agencourt Ampure XP magnetic beads at a ratio of 0.8:1 beads to sample. The  
587 sequencing library was then amplified using 17 µL of 2X KAPA HiFi HotStart ReadyMix (Roche),  
588 2 µL of Illumina primer mix and 15 µL of adaptor-ligated library followed by 98°C for 45 s, 98°C  
589 for 15 s, 60°C for 30 s, 72°C for 30 s, and then a repetition of steps 2-4 for 8 cycles, followed by  
590 72°C for 1 m and 4°C until further use. Amplified samples were then cleaned using Agencourt  
591 Ampure XP magnetic beads in a ratio of 0.8:1 beads to sample. DNA library sizes were then  
592 analyzed using a BioAnalyzer DNA 1000 kit (Agilent) and the DNA concentration was quantified  
593 using Qubit High Sensitivity DNA kit (Thermo Fisher) lLibraries were diluted to 2 nM in 10 mM of  
594 TE and samples were sequenced with MiSeq (Illumina) using a paired-end approach. We used  
595 a previously described workflow [64] to determine M1404I allele frequencies. Briefly, sequence  
596 reads were trimmed to remove primer sequences and low quality base calls before they were



597 aligned to the Zika Paraiba\_01 reference genome using BWA-mem (69). Mutants over a 3%  
598 minor allele frequency were called using SAMtools mpileup (70) and were filtered according to  
599 frequency and strand biases. After sequencing, the ratios of G (encoding M1404) versus A  
600 (encoding I1404) were calculated and are represented as a percent of total sequencing depth at  
601 the locus.

602

### 603 ***Statistical analyses***

604 Statistical analyses were performed using GraphPad Prism 7 (GraphPad Software). Tests used  
605 are indicated in results and figure legends. Statistical significance is denoted by P values of less  
606 than 0.05.

607

### 608 **DATA AVAILABILITY**

609 Sequencing data are available in the NCBI SRA at accession number PRJNA556052.

610

### 611 **ACKNOWLEDGEMENTS**

612 We acknowledge Priya Shah and Paul Luciw for productive discussions. We acknowledge  
613 pathology services at the California National Primate Research center for assisting with rhesus  
614 macaque experiments. This work was performed under the auspices of the U.S. Department of  
615 Energy by Lawrence Livermore National Laboratory under Contract DE-AC52-07NA27344.

616

### 617 **FUNDING SOURCES**

618 This study was supported by the Office of Research Infrastructure Programs/OD  
619 (P51OD011107), start-up funds from the University of California, Davis School of Veterinary  
620 Medicine Pathology, Microbiology and Immunology Department to L.L.C., 1R21AI129479-S to  
621 K.K.A.V.R., 1R01HL105704 and 1R33AI129077 to C.Y.C., the UC Davis School of Veterinary  
622 Medicine Graduate Student Support Program Fellowship and a *Science without Borders*

623 fellowship from Brazilian government to D.L., and the Division of Intramural Research Program  
624 of the National Institute of Allergy and Infectious Diseases, National Institutes of Health. W.L.  
625 acknowledges funding support from the Pacific Southwest Regional Center of Excellence for  
626 Vector-Borne Diseases funded by the U.S. Centers for Disease Control and Prevention  
627 (Cooperative Agreement 1U01CK000516). The funders had no role in study design, data  
628 collection and analysis, decision to publish, or preparation of the manuscript.

629

### 630 **AUTHOR CONTRIBUTIONS**

631 Conceptualization: D.L., L.L.C., K.K.A.V.R., N.G., K.A. Methodology: D.L., J.B.S., W.L. L.L.C.,  
632 K.K.A.V.R., Investigation: D.L., J.B.S., W.L., A.S., J.W., J.U., R.I.K., G.O., S.S., N.G., M.B., J.A.,  
633 J.T., K.A.T., A.G.P., L.L.C., K.K.A.V.R., C.Y.C. Writing-original draft: D.L., L.L.C. Writing-review  
634 and editing: L.L.C. D.L., J.B.S., K.K.A.V.R., K.A.T., R.I.K., N.D.G., M.B., C.Y.C. Visualization:  
635 D.L., L.L.C., K.K.A.v.R. Supervision and project administration: L.L.C.. Funding acquisition:  
636 L.L.C., K.K.A.V.R, C.C., K.A., M.B, A.G.P, C.Y.C.

637

638

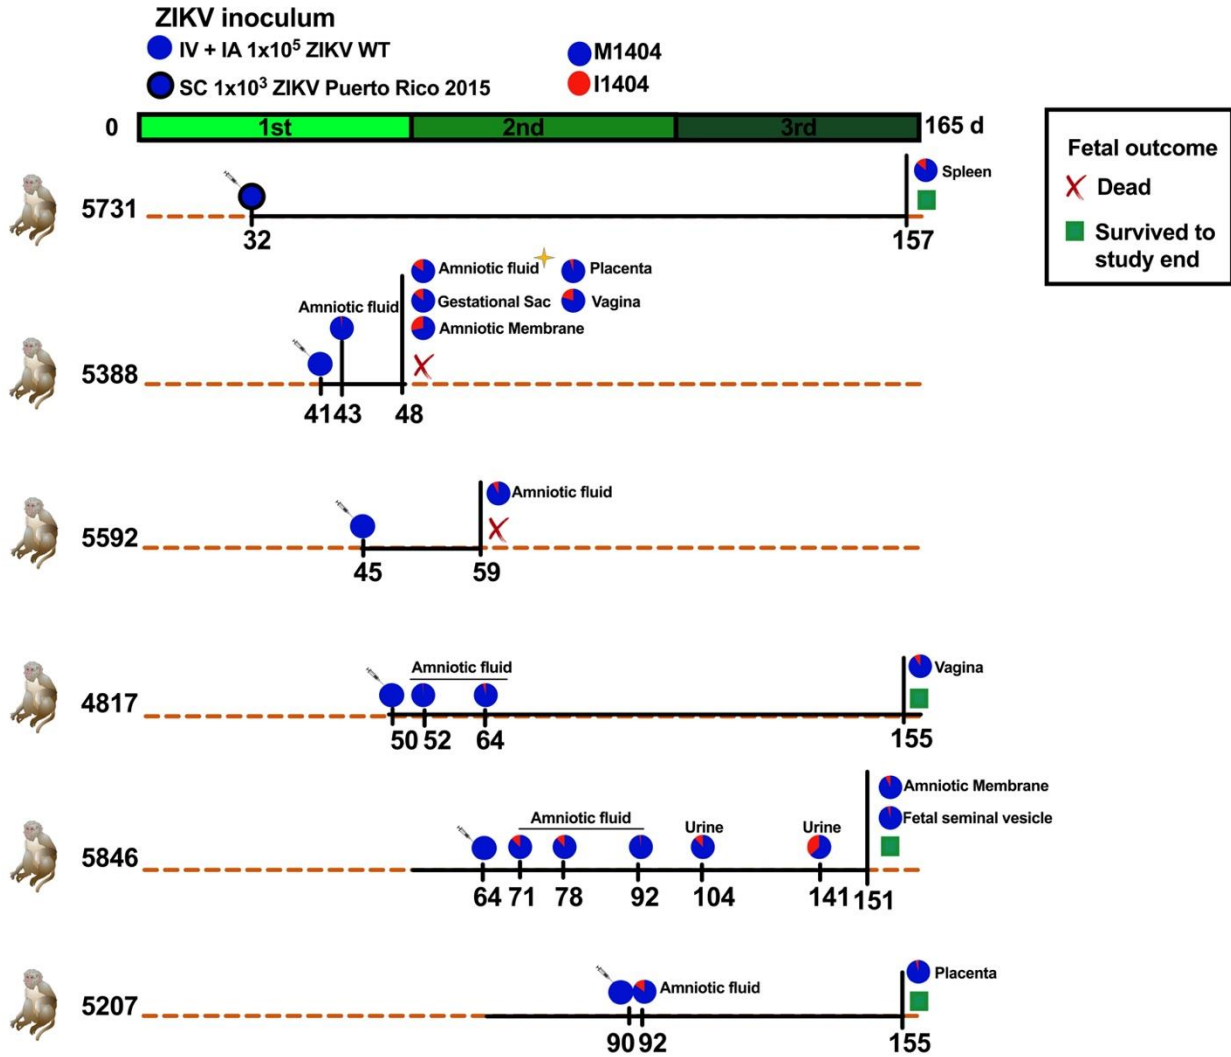

639

640 **Figure 1. A ZIKV mutant arose or increased in frequency in six pregnant rhesus**

641 **macaques inoculated with two different ZIKV strains via two routes. Experimental design**

642 for inoculation of pregnant rhesus macaques with  $1 \times 10^5$  ZIKV WT (KU321639.1, a 2015

643 Brazilian strain) both intravenously (IV) and intraamniotically (IA), blue circle, or  $1 \times 10^3$  of ZIKV

644 Puerto Rico 2015 (KU501215.1) delivered subcutaneously (SC), blue circle with thick black

645 border, on days indicated by syringes. For more details on study design, see Coffey *et al.* [23]

646 and Van Rompay *et al.* [33]. Both inocula contained mostly M1404 where I1404 was absent or

647 present at the limit of detection, ~1%. The green line shows the duration of each rhesus

648 macaque pregnancy divided into 3 ~55 day trimesters where full-term is 165 days. The orange

649 dotted lines represent 165 days of gestation and the black solid lines show the period of  
650 infection and experiment end for each dam and their fetus. Fetal death is shown as a red X.  
651 Fetuses that survived to the study endpoint, gestation day 155, are indicated with green  
652 squares. The golden star represents the first detection of I1404; full genome sequencing of this  
653 specimen showed no other genome-wide mutations. The pie charts represent the relative  
654 abundance of the amino acid at position 1404. The I1404 mutation was not detected in 4  
655 additional pregnant macaques in the same study (not shown here but included in **Supplemental**  
656 **Table 2**). Supplemental Table 2 shows the depth of sequencing coverage for the data  
657 represented in pie charts. Tissues listed are maternal unless otherwise indicated.  
658

659

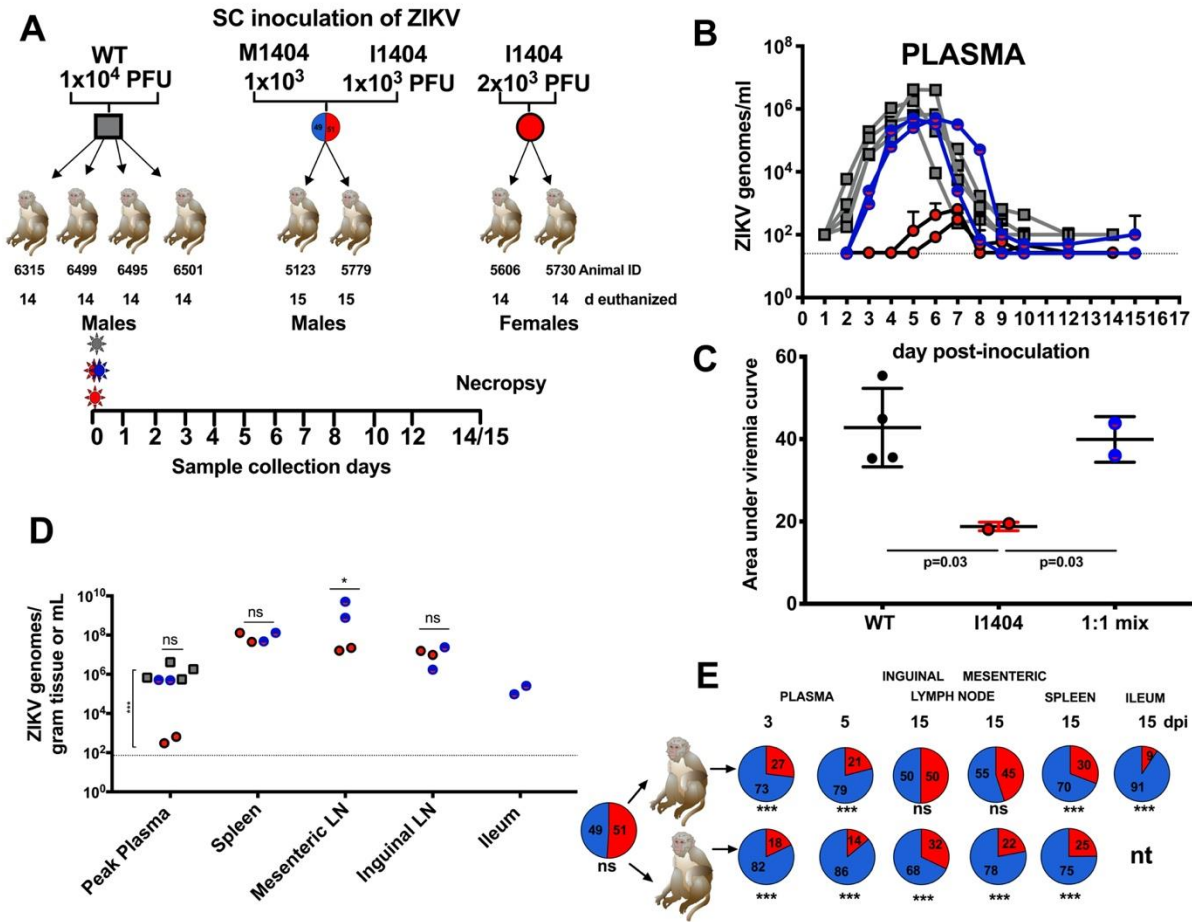

660

661 **Figure 2. A ZIKV mutant, I1404, generates lower viremias and is less abundant than**

662 **M1404 in tissues of non-pregnant rhesus macaques after mixed inoculation. (A)**

663 Experimental design for subcutaneous (SC) ZIKV inoculation of male and non-pregnant female

664 rhesus macaques with ZIKV WT (left), a 1:1 mixture of infectious clone derived ZIKV I1404 and

665 M1404 (middle) or infectious clone derived ZIKV I1404 (right) at indicated doses. The 1:1

666 mixture was verified by sequencing the inoculum prior to administration to macaques. Blood

667 was collected daily from 1 to 8, 10 and 12, and at either 14 or 15 dpi, at which point animals

668 were euthanized for tissue collection. **(B)** Plasma viremia kinetics for individual rhesus

669 macaques inoculated with ZIKV WT (grey), the 1:1 mixture (blue) or ZIKV I1404 (red). The

670 dotted line shows the limit of detection,  $1.4 \times 10^1$  genome copies/mL plasma. Error bars show

671 standard deviations for triplicate measurements. **(C)** The area under the curve (AUC) for rhesus  
672 macaques infected with I1404 compared to WT or the 1:1 mix. AUC statistics were performed  
673 on log-transformed viremia measurements (one-way ANOVA). **(D)** ZIKV RNA levels in tissues of  
674 rhesus macaques. LN is lymph node. \*  $p=0.04$ ; ns is not significantly different at  $p=0.05$  (one-  
675 way ANOVA). The dotted line represents the mean limit of detection,  $1.9 \times 10^1$  ZIKV genome  
676 copies/gram tissue or mL. **(E)** Targeted quantitative sequencing flanking ZIKV 1404 showing the  
677 relative abundance of M1404 (blue) or I1404 (red) in indicated tissues from male rhesus  
678 macaques inoculated with the 1:1 mixture (\*\* $p < 0.01$ , ns is not significantly different at  $p=0.05$ ,  
679 chi-squared tests). **Supplemental Table 3** shows the depth of sequencing coverage for the  
680 data represented here. Each dot in panels B,C and D shows the mean of triplicate qRT-PCR  
681 ZIKV RNA measurements.  
682

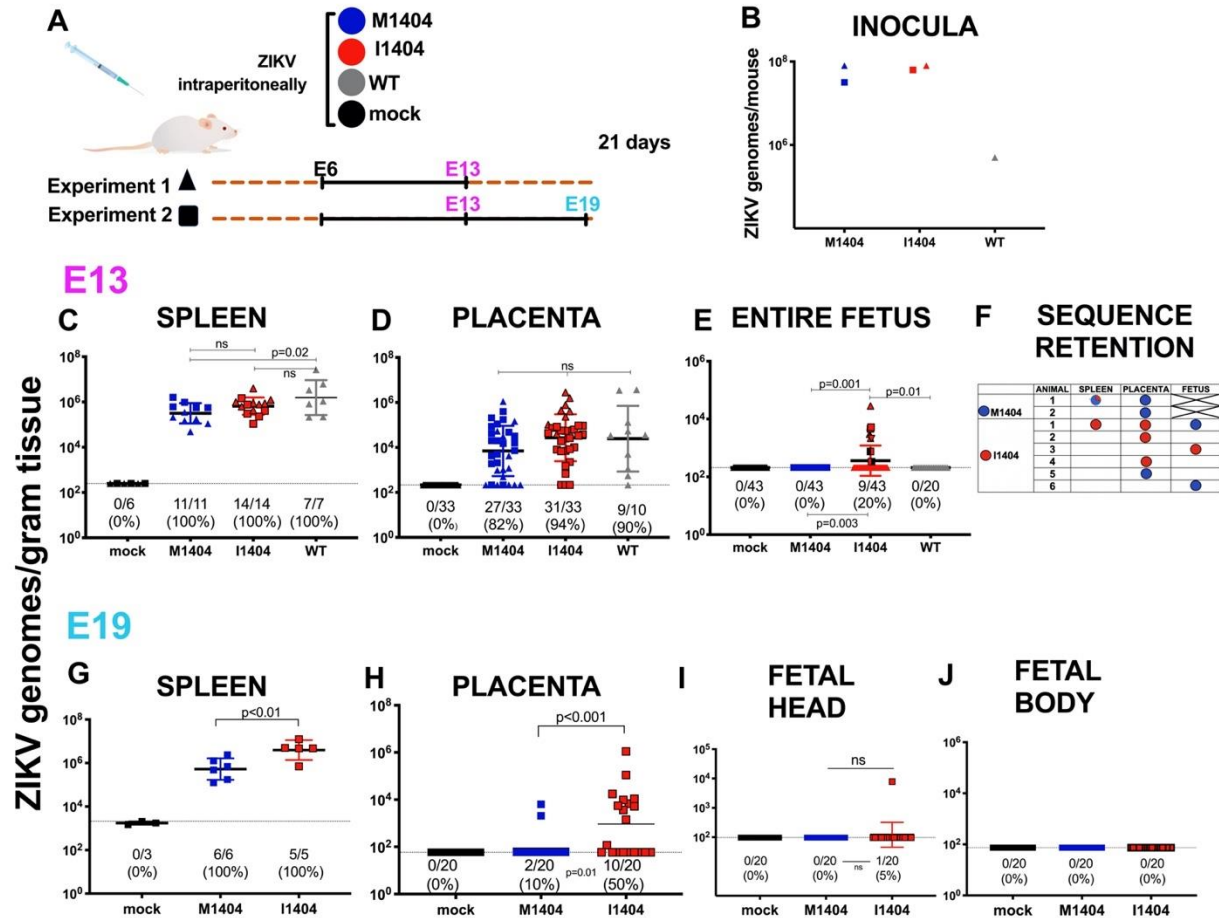

683

684 **Figure 3. ZIKV I1404 produces higher spleen and placental ZIKV RNA titers and confers**

685 **fetal infection in infected pregnant mice. (A)** Experimental design showing intraperitoneal

686 inoculation of pregnant CD-1 mice with ZIKV M1404 (blue), I1404 (red), WT (grey), or mock

687 (DMEM, black) on embryonic day 6 (E6) of pregnancy, where full term in mice is E21. Two

688 experiments were performed. In experiment 1 (triangles), dams were euthanized on E13. In

689 experiment 2 (squares), dams were euthanized on E13 or E19. **(B)** Back titration of residual

690 inocula. ZIKV RNA levels in maternal spleens **(C)**, placentas **(D)** and **(E)** fetuses at E13.

691 Different patterns of shading for triangles and squares in E show different dams (N=7) from

692 which infected fetuses were detected. **(F)** Sanger sequencing of maternal tissues or fetuses

693 shows I1404 reverts to M1404 in some animals. An 'X' indicates no fetuses had detectable ZIKV

694 RNA so could not be sequenced. An empty field indicates sequencing was not attempted from

695 that sample. ZIKV RNA levels in **(G)** maternal spleens **(H)** placentas, **(I)** fetus heads, and **(J)**  
696 fetus bodies at E19. Each dot represents one tissue sample and is reported as the mean of 3  
697 ZIKV RNA qRT-PCR replicates. Group means are shown as black lines, and include samples  
698 with no detectable ZIKV RNA, which were reported at the limit of detection (LOD). Only samples  
699 with 3/3 qRT-PCR replicates with detectable ZIKV RNA are reported above the LOD. The dotted  
700 line denotes the LOD, which was a mean of  $1.8 \times 10^1$  ZIKV RNA copies/gram tissue for all panels  
701 except G, where the LOD was  $3.3 \times 10^3$  ZIKV RNA copies/gram tissue. Statistical analyses  
702 comparing means used ANOVA multiple comparisons. Rates of ZIKV RNA positive samples in  
703 each group were compared with Fisher's exact statistics.

704

705



706

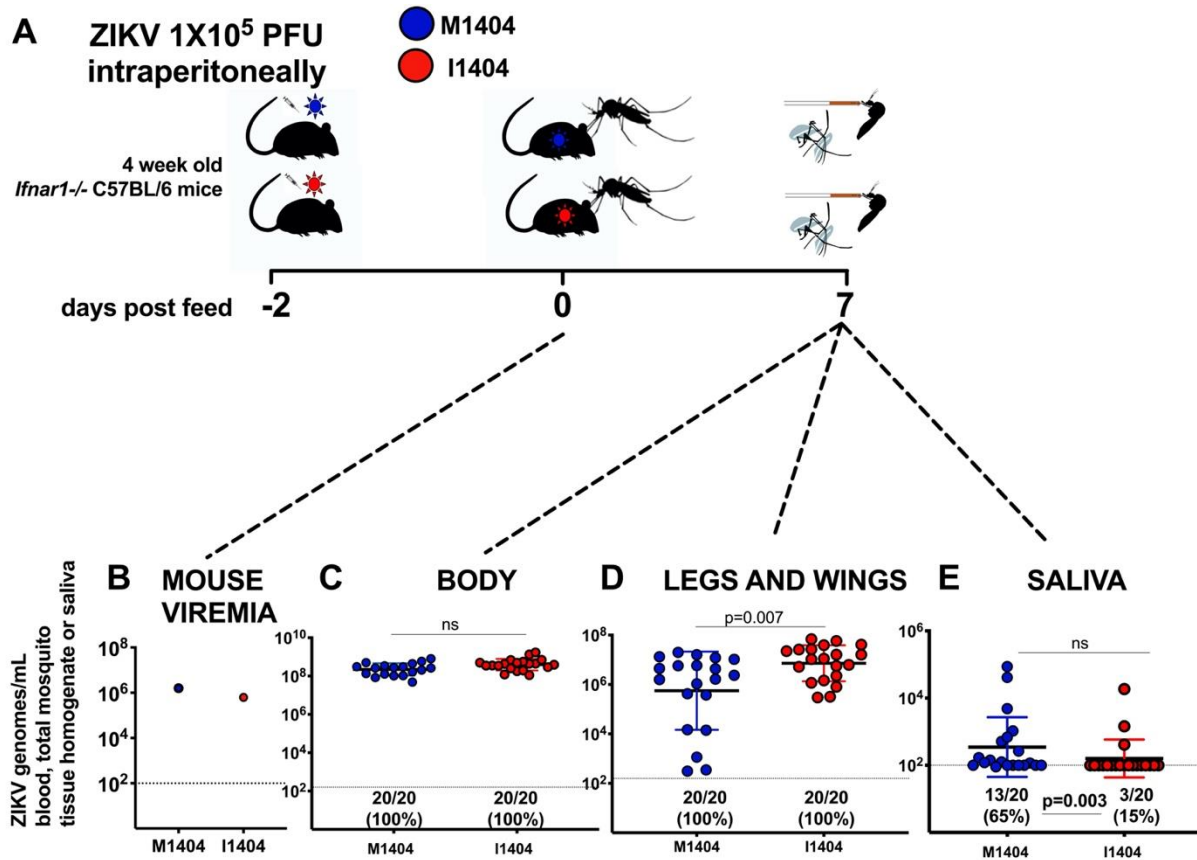

707

708 **Figure 4. *Aedes aegypti* transmit ZIKV I1404 less efficiently than M1404.** (A) Experimental

709 design showing intraperitoneal inoculation of 1X10<sup>5</sup> PFU per *Ifnar1*<sup>-/-</sup> mouse with ZIKV M1404

710 (blue) or I1404 (red), two days prior to mosquito feeding, followed by presentation of viremic

711 mice to mosquitoes, a seven day incubation period and harvesting of mosquito bodies, legs and

712 wings, and saliva to assess infection, dissemination, and transmission rates and magnitudes of

713 ZIKV RNA, which were quantified by qRT-PCR. (B) Mouse viremias immediately post-feed

714 show that mosquitoes in both groups were exposed to similar quantities of virus in ingested

715 blood. (C) ZIKV I1404 infects *Ae. aegypti* bodies and (D) disseminates into legs and wings at

716 similar rates and significantly higher mean ZIKV RNA levels than M1404 but (E) is significantly

717 less transmissible in saliva although transmitted doses are not different. Each dot represents

718 mean ZIKV genomes measured in mouse blood or individual *Ae. aegypti* tissue or saliva sample

719 7 days post feed. Only samples with 3/3 replicates with a detectable qRT-PCR value are  
720 reported above the limit of detection. The dotted line represents the limit of detection,  $2 \times 10^2$   
721 ZIKV genome copies/mosquito sample or blood. P values comparing mean genome levels are  
722 from unpaired t-tests. Rates were compared with Fisher's exact statistics.  
723

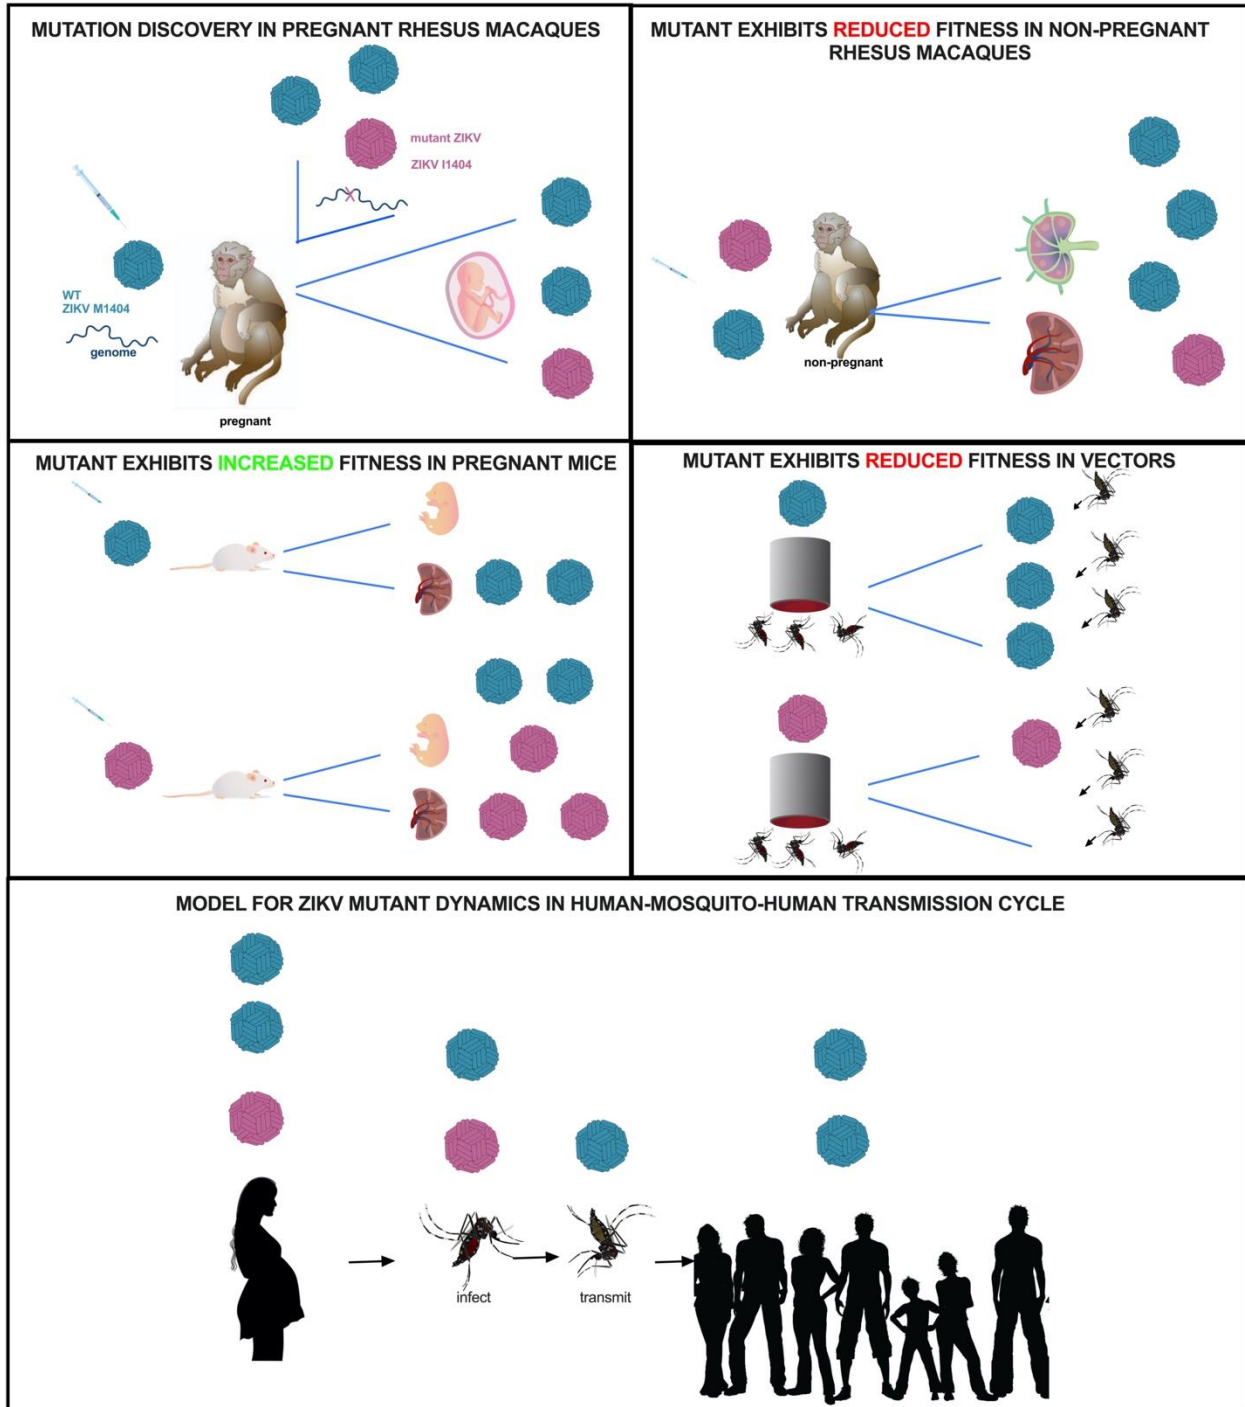

724

725 **Figure 5: Fitness dynamics for mutant ZIKV.** Visual representation of ZIKV M1404 (blue) and  
726 I1404 (red) fitness dynamics in the experimental systems used in this study. The bottom panel  
727 shows a model for possible transmission dynamics of the mutant in human-mosquito-human  
728 cycling, where human infection dynamics are predicted from observations in rhesus macaques.

729

730

731 SUPPLEMENTAL FIGURES AND TABLES

732

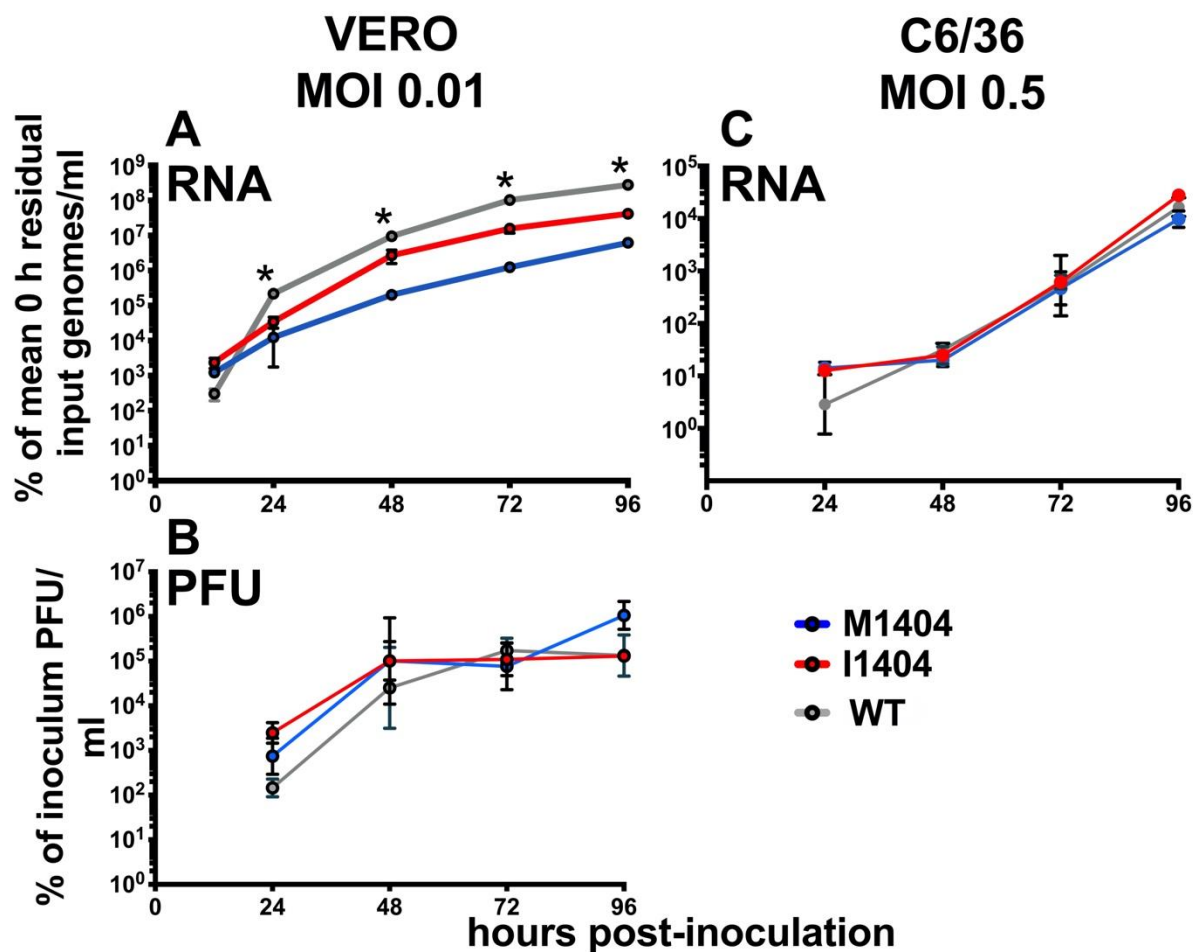

733

734 Supplemental Figure 1. Growth kinetics of ZIKV M1404, I1404, and WT in African green

735 monkey kidney (Vero) and *Aedes albopictus* (C6/36) cells. (A) ZIKV I1404 exhibits superior

736 ZIKV RNA growth kinetics compared to M1404 from 24 to 96 hpi in Vero cells at a MOI of 0.01.

737 Asterisks denote  $p < 0.001$  across all groups. (B) Infectious ZIKV levels in Vero cells from 24-96

738 hpi are not different between ZIKV M1404, I1404, and WT ( $p > 0.05$ ). (C) ZIKV RNA levels in

739 C6/36 cells at a MOI of 0.5 are not different across groups ( $p > 0.05$ ). Each dot represents the

740 mean of 3 replicate supernatant samples, where each supernatant was measured in 3 qRT-

741 PCR replicates. RNA and PFU measurements for A and B were from the same supernatants.  
742 Statistical tests used were repeated measures 2-way ANOVA. Error bars show standard  
743 deviations. MOI is multiplicity of infection.  
744

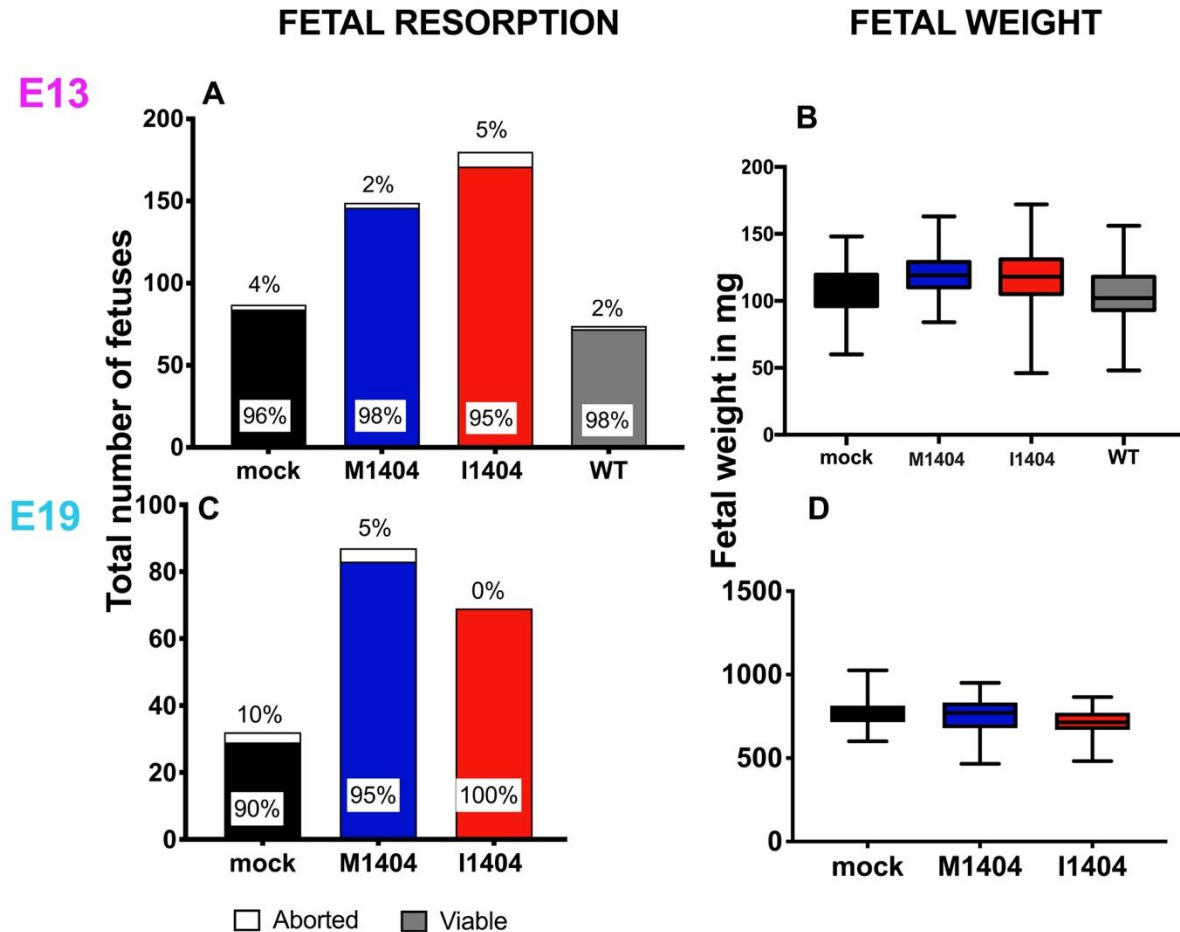

745  
746 **Supplemental Figure 2. Relative to M1404 or WT, the ZIKV mutant I1404 does not**  
747 **augment fetal death or decrease fetal weight in ZIKV infected pregnant CD-1 mice.** Mice  
748 were inoculated as shown in Figure 3A. No significant differences in rates of fetal resorption  
749 (A,C) or weight (B,D) on gestation day of harvest, E13 or E19, were detected across groups of  
750 pregnant mice infected with ZIKV M1404, I1404, WT, or that were mock-inoculated. The lines in  
751 the middle of each box for panels B and D show the mean and error bars show standard

752 deviations. Resorption rates were compared with chi-squared statistics. Mean weights were  
753 compared with ANOVA multiple comparisons statistics.

754

755

756

757 **Supplemental Table 1.** Primers used for Sanger sequencing ZIKV in this study.

| ZIKV Primer Name | Primer Sequence (5' to 3') |
|------------------|----------------------------|
| 28p              | CGACAGTTCGAGTTTGAAGCG      |
| 430p             | CCAGTGTCGGAATTGTTGGC       |
| 563n             | CCCCAGTGTGGTTGGAAAAG       |
| 904p             | GGCTTTTGGGAAGCTCAACG       |
| 1048n            | ACAACATCAACCCAGGTCCC       |
| 1200p            | CCAACACAAGGTGAAGCCTAC      |
| 1489n            | GGCGTTATCTCAACCTTCGC       |
| 1618p            | ACAAGGAGTGGTTCCATGACA      |
| 1776n            | TGTGAACGGCTCCTTCTTGAC      |
| 1970p            | GTATGCAGGGACAGATGGACC      |
| 2204n            | TTTTCCGATGGTGCTGCCAC       |
| 2301p            | GGCAAGGGCATCCATCAAAT       |
| 2537n            | ACCGCATCTCGTTTCCTTCTT      |
| 2749p            | CGGTCGTTGTGGGATCTGTAA      |
| 2979n            | GAAATACCCCGAACCCGTGA       |
| 3246p            | CACCACAACACCAGAGAGGG       |
| 3393n            | TGGTTGATCTCAGGGACGGT       |
| 3711p            | AAGCTTGCAATTCTGATGGGTG     |
| 3894n            | CAGTTTGCAGAAGGCACGAG       |
| 4144p            | CCTTGGGACTAACCGCTGTG       |
| 4299n            | TATCTGCTTTGGCGAACCTC       |
| 4634p            | GCCTGCTCCCAAGGAAGTAAA      |
| 4809n            | CAAGTCTCCCTTCACCGCTC       |

|        |                       |
|--------|-----------------------|
| 5197p  | ATCCTGGAGCTGGGAAAACC  |
| 5342n  | GTAACGCACTGGAAGCCCT   |
| 5814p  | CAAGAGTGGGACTTCGTCGTA |
| 5924n  | GCCATCAAGTATGACCGGCT  |
| 6379p  | TGCTCAAACCGAGGTGGATG  |
| 6516n  | TCATGTGTCCTGGCAGTGTT  |
| 6878p  | CATGGTAGCAGTGGGTCTTCT |
| 7063n  | ATGAGAGTTGTCAGAGCGGC  |
| 7451p  | CATCTCCAGTGCCGTTCTGC  |
| 7573n  | GCTGTGGAGGAGTTCCAGTAT |
| 7925p  | CTGGAGTTACTACGCCGCC   |
| 8075n  | CGCCATGTGAAAGACGTCCA  |
| 8510p  | CGTTGAGAGGATCCGCAGTG  |
| 8649n  | GCCTGACAACCCCGTTTATG  |
| 9059p  | GGAATTTGGAAAGGCCAAGGG |
| 9206n  | TAATCCCAGCCCTTCAACACC |
| 9614p  | GCAGAGCAACGGATGGGATA  |
| 9763n  | GAGGGTTTCCACTCCTGTGT  |
| 10220p | TCTTATAGGGCACAGACCACG |
| 10365n | GTGTGGACCCTTCTTCACCC  |
| 10803n | CCATGGATTTCCCCACACCG  |

758

759

760



761 **Supplemental Table 2.** Deep sequencing data showing the percentage of reads that encode  
 762 ZIKV I1404 in inocula and experimentally infected pregnant rhesus macaques. For most  
 763 samples, a targeted sequencing approach flanking ZIKV polyprotein amino acid 1404 was used.  
 764 <sup>a, b</sup> and <sup>c</sup> show data from different laboratories. <sup>a</sup> is The Scripps Research Institute, <sup>b</sup> is  
 765 University of California San Francisco, and <sup>c</sup> is Lawrence Livermore National Laboratories. PR  
 766 is Puerto Rico, WT is SPH2015, a Brazilian strain, KU321639, N/A is not applicable, DPI is day  
 767 post inoculation, IV is intravenous, IA is intraamniotic, SC is subcutaneous.

| ANIMAL IDENTIFIER or INOCULUM | ZIKV STRAIN | INOCULATION ROUTE | FETAL OUTCOME | STUDY END POINT (DPI) | TISSUE                  | DPI | COVERAGE AT 1404 | % I1404 MUTANT (AUA) |
|-------------------------------|-------------|-------------------|---------------|-----------------------|-------------------------|-----|------------------|----------------------|
| Inoculum                      | PR 2015     | SC                | N/A           | N/A                   | N/A                     | N/A | 2242             | 0% <sup>a</sup>      |
| Inoculum                      | WT          | IV + IA           | N/A           | N/A                   | N/A                     | N/A | 5705             | 0.2% <sup>b</sup>    |
| Inoculum                      | WT          | IV + IA           | N/A           | N/A                   | N/A                     | N/A | 2296             | 1.3% <sup>a</sup>    |
| 5731                          | PR 2015     | SC                | Near term     | 125                   | Maternal Spleen         | 125 | 15               | 14% <sup>a</sup>     |
| 5388                          | WT          | IV + IA           | Death         | 7                     | Amniotic fluid          | 2   | 1175             | 25% <sup>b</sup>     |
| 5388                          | WT          | IV + IA           | Death         | 7                     | Amniotic fluid          | 7   | 2564             | 17% <sup>a</sup>     |
| 5388                          | WT          | IV + IA           | Death         | 7                     | Gestational Sac         | 7   | 8020             | 14% <sup>a</sup>     |
| 5388                          | WT          | IV + IA           | Death         | 7                     | Amniotic membrane       | 7   | 309              | 25% <sup>c</sup>     |
| 5388                          | WT          | IV + IA           | Death         | 7                     | Amniotic membrane       | 7   | 4492             | 28% <sup>a</sup>     |
| 5388                          | WT          | IV + IA           | Death         | 7                     | Placenta full thickness | 7   | 5477             | 5% <sup>a</sup>      |
| 5388                          | WT          | IV + IA           | Death         | 7                     | Vagina                  | 7   | 777              | 19% <sup>c</sup>     |
| 5388                          | WT          | IV + IA           | Death         | 7                     | Spleen                  | 7   | 6235             | 0% <sup>a</sup>      |
| 5388                          | WT          | IV + IA           | Death         | 7                     | Inguinal Lymph node     | 7   | 4332             | 0.1% <sup>a</sup>    |
| 5388                          | WT          | IV + IA           | Death         | 7                     | Fetal Lung              | 7   | 6236             | 0% <sup>a</sup>      |
| 5388                          | WT          | IV + IA           | Death         | 7                     | Fetal Intestine         | 7   | 21444            | 0% <sup>a</sup>      |
| 5388                          | WT          | IV + IA           | Death         | 7                     | Fetal Brain             | 7   | 4581             | 0.2% <sup>a</sup>    |
| 5592                          | WT          | IV + IA           | Death         | 14                    | Amniotic fluid          | 14  | 13               | 8% <sup>a</sup>      |
| 5592                          | WT          | IV + IA           | Death         | 14                    | Inguinal Lymph node     | 14  | 2389             | 0% <sup>a</sup>      |
| 5592                          | WT          | IV + IA           | Death         | 14                    | Amniotic membrane       | 14  | 7695             | 0% <sup>a</sup>      |
| 5592                          | WT          | IV + IA           | Death         | 14                    | Fetal intestine         | 14  | 9362             | 0.1% <sup>a</sup>    |
| 5592                          | WT          | IV + IA           | Death         | 14                    | Fetal kidney            | 14  | 6812             | 0.1% <sup>a</sup>    |
| 5592                          | WT          | IV + IA           | Death         | 14                    | Fetal brain             | 14  | 2849             | 0.1% <sup>a</sup>    |
| 4817                          | WT          | IV + IA           | Near term     | 105                   | Amniotic fluid          | 2   | 8000             | 0% <sup>c</sup>      |

|      |              |         |           |     |                             |     |        |                   |
|------|--------------|---------|-----------|-----|-----------------------------|-----|--------|-------------------|
| 4817 | WT           | IV + IA | Near term | 105 | Amniotic fluid              | 14  | 438486 | 4% <sup>a</sup>   |
| 4817 | WT           | IV + IA | Near term | 105 | Amniotic fluid              | 21  | 2560   | 5% <sup>a</sup>   |
| 4817 | WT           | IV + IA | Near term | 105 | Vagina                      | 105 | 1232   | 9% <sup>c</sup>   |
| 5846 | WT           | IV + IA | Near term | 87  | Amniotic fluid              | 7   | 15869  | 13% <sup>a</sup>  |
| 5846 | WT           | IV + IA | Near term | 87  | Amniotic fluid              | 14  | 5439   | 12% <sup>a</sup>  |
| 5846 | WT           | IV + IA | Near term | 87  | Amniotic fluid              | 21  | 10045  | 35% <sup>a</sup>  |
| 5846 | WT           | IV + IA | Near term | 87  | Amniotic fluid              | 28  | 333    | 2% <sup>c</sup>   |
| 5846 | WT           | IV + IA | Near term | 87  | Amniotic membrane           | 87  | 217    | 7% <sup>c</sup>   |
| 5846 | WT           | IV + IA | Near term | 87  | Fetal seminal vesicle       | 87  | 557    | 3% <sup>c</sup>   |
| 5846 | WT           | IV + IA | Near term | 87  | Urine                       | 40  | 1929   | 11% <sup>c</sup>  |
| 5846 | WT           | IV + IA | Near term | 87  | Urine                       | 77  | 1725   | 37% <sup>c</sup>  |
| 5846 | WT           | IV + IA | Near term | 87  | Placenta                    | 87  | 2991   | 0% <sup>c</sup>   |
| 5846 | WT           | IV + IA | Near term | 87  | Fetal brain                 | 87  | 2800   | 0% <sup>c</sup>   |
| 5846 | WT           | IV + IA | Near term | 87  | Amniotic fluid              | 2   | 7842   | 0.3% <sup>a</sup> |
| 5207 | WT           | IV + IA | Near term | 65  | Amniotic fluid              | 2   | 8797   | 14% <sup>c</sup>  |
| 5207 | WT           | IV + IA | Near term | 65  | Placenta                    | 65  | 5130   | 4% <sup>c</sup>   |
| 5462 | WT + PR 2015 | IV + IA | Death     | 73  | Amniotic fluid              | 7   | 6151   | 0% <sup>a</sup>   |
| 5462 | WT           | IV + IA | Death     | 73  | Amniotic fluid              | 14  | 6686   | 0.4% <sup>a</sup> |
| 5462 | WT           | IV + IA | Death     | 73  | Fetal Lung                  | 70  | 5016   | 0% <sup>a</sup>   |
| 5507 | PR 2015      | SC      | Death     | 30  | Amniotic membrane           | 30  | 5052   | 0% <sup>a</sup>   |
| 5512 | PR 2015      | SC      | Near term | 121 | Amniotic membrane           | 121 | 5318   | 0% <sup>a</sup>   |
| 5803 | WT + PR 2015 | IV + IA | Death     | 42  | Fetal lung                  | 42  | 14467  | 0% <sup>a</sup>   |
| 5803 | WT+ PR 2015  | IV + IA | Death     | 42  | Fetal ileum                 | 42  | 7137   | 0% <sup>a</sup>   |
| 5803 | WT+ PR 2015  | IV + IA | Death     | 42  | Fetal kidney                | 42  | 12886  | 0% <sup>a</sup>   |
| 5803 | WT + PR 2015 | IV + IA | Death     | 42  | Fetal brain – parietal lobe | 42  | 5491   | 0.1% <sup>a</sup> |
| 5803 | WT + PR 2015 | IV + IA | Death     | 42  | Placenta full thickness     | 42  | 11923  | 0% <sup>a</sup>   |
| 5803 | WT + PR 2015 | IV + IA | Death     | 42  | Amniotic membrane           | 42  | 4935   | 0% <sup>a</sup>   |

768

769

770

771

772

773 **Supplemental Table 3.** Deep sequencing data showing the percentage of reads at ZIKV 1404  
774 in non-pregnant rhesus macaques. '1:1 Mix' denotes an equal mixture of ZIKV M1404 and  
775 I1404. LN is lymph node. DPI is days post-inoculation. SC is subcutaneous. These same data  
776 are shown graphically in Figure 2E.  
777

| ANIMAL IDENTIFIER or INOCULUM | ZIKV STRAIN | INOCULATION ROUTE | TISSUE        | DPI | NUCLEOTIDE COVERAGE AT 1404 | % I1404 MUTANT |
|-------------------------------|-------------|-------------------|---------------|-----|-----------------------------|----------------|
| INOCULUM                      | 1:1 Mix     | N/A               | N/A           | N/A | 1013                        | 51%            |
| 5123                          | 1:1 Mix     | SC                | Plasma        | 3   | 7920                        | 18%            |
| 5123                          | 1:1 Mix     | SC                | Plasma        | 5   | 7                           | 14%            |
| 5123                          | 1:1 Mix     | SC                | Inguinal LN   | 15  | 1607                        | 32%            |
| 5123                          | 1:1 Mix     | SC                | Mesenteric LN | 15  | 881                         | 22%            |
| 5123                          | 1:1 Mix     | SC                | Spleen        | 15  | 170                         | 25%            |
| 5779                          | 1:1 Mix     | SC                | Plasma        | 3   | 7922                        | 27%            |
| 5779                          | 1:1 Mix     | SC                | Plasma        | 5   | 7888                        | 21%            |
| 5779                          | 1:1 Mix     | SC                | Ileum         | 15  | 384                         | 9%             |
| 5779                          | 1:1 Mix     | SC                | Inguinal LN   | 15  | 412                         | 50%            |
| 5779                          | 1:1 Mix     | SC                | Mesenteric LN | 15  | 126                         | 45%            |
| 5779                          | 1:1 Mix     | SC                | Spleen        | 15  | 496                         | 31%            |

778

779

780

781

782

783

784

785

786

787

788

789 **REFERENCES**

- 790 1. Duffy MR, Chen TH, Hancock WT, Powers AM, Kool JL, Lanciotti RS, Pretrick M, Marfel  
791 M, Holzbauer S, Dubray C, Guillaumot L, Griggs A, Bel M, Lambert AJ, Laven J, Kosoy  
792 O, Panella A, Biggerstaff BJ, Fischer M, Hayes EB. 2009. Zika virus outbreak on Yap  
793 Island, Federated States of Micronesia. *N Engl J Med* 2009/06/12. 360:2536–2543.
- 794 2. Hayes EB. 2009. Zika virus outside Africa. *Emerg Infect Dis* 15:1347–1350.
- 795 3. Martines RB, Bhatnagar J, de Oliveira Ramos AM, Davi HPF, Iglezias SDA, Kanamura  
796 CT, Keating MK, Hale G, Silva-Flannery L, Muehlenbachs A, Ritter J, Gary J, Rollin D,  
797 Goldsmith CS, Reagan-Steiner S, Ermias Y, Suzuki T, Luz KG, de Oliveira WK, Lanciotti  
798 R, Lambert A, Shieh WJ, Zaki SR. 2016. Pathology of congenital Zika syndrome in Brazil:  
799 a case series. *Lancet* 388:898–904.
- 800 4. de Noronha L, Zanluca C, Azevedo MLV, Luz KG, dos Santos CND. 2016. Zika virus  
801 damages the human placental barrier and presents marked fetal neurotropism. *Mem Inst*  
802 *Oswaldo Cruz* 111:287–293.
- 803 5. Brasil P, Pereira Jr. JP, Raja Gabaglia C, Damasceno L, Wakimoto M, Ribeiro Nogueira  
804 RM, Carvalho de Sequeira P, Machado Siqueira A, Abreu de Carvalho LM, Cotrim da  
805 Cunha D, Calvet GA, Neves ES, Moreira ME, Rodrigues Baiao AE, Nassar de Carvalho  
806 PR, Janzen C, Valderramos SG, Cherry JD, Bispo de Filippis AM, Nielsen-Saines K.  
807 2016. Zika Virus Infection in Pregnant Women in Rio de Janeiro - Preliminary Report. *N*  
808 *Engl J Med*.
- 809 6. Oliveira Melo AS, Malinge G, Ximenes R, Szejnfeld PO, Alves Sampaio S, Bispo de  
810 Filippis AM. 2016. Zika virus intrauterine infection causes fetal brain abnormality and  
811 microcephaly: tip of the iceberg? *Ultrasound Obs Gynecol* 47:6–7.
- 812 7. Costello A, Dua T, Duran P, Gulmezoglu M, Oladapo OT, Perea W, Pires J, Ramon-

- 813 Pardo P, Rollins N, Saxena S. 2016. Defining the syndrome associated with congenital  
814 Zika virus infection. *Bull World Heal Organ* 94:406-406A.
- 815 8. Soares de Oliveira-Szejnfeld P, Levine D, Melo AS de O, Amorim MMR, Batista AGM,  
816 Chimelli L, Tanuri A, Aguiar RS, Malinger G, Ximenes R, Robertson R, Szejnfeld J,  
817 Tovar-Moll F. 2016. Congenital Brain Abnormalities and Zika Virus: What the Radiologist  
818 Can Expect to See Prenatally and Postnatally. *Radiology* 281:203–218.
- 819 9. Chimelli L, Melo ASO, Avvad-Portari E, Wiley CA, Camacho AHS, Lopes VS, Machado  
820 HN, Andrade C V, Dock DCA, Moreira ME, Tovar-Moll F, Oliveira-Szejnfeld PS, Carvalho  
821 ACG, Ugarte ON, Batista AGM, Amorim MMR, Melo FO, Ferreira TA, Marinho JRL,  
822 Azevedo GS, Leal J, da Costa RFM, Rehen S, Arruda MB, Brindeiro RM, Delvechio R,  
823 Aguiar RS, Tanuri A. 2017. The spectrum of neuropathological changes associated with  
824 congenital Zika virus infection. *Acta Neuropathol* 133:983–999.
- 825 10. França GVA, Schuler-Faccini L, Oliveira WK, Henriques CMP, Carmo EH, Pedi VD,  
826 Nunes ML, Castro MC, Serruya S, Silveira MF, Barros FC, Victora CG. 2016. Congenital  
827 Zika virus syndrome in Brazil: a case series of the first 1501 livebirths with complete  
828 investigation. *Lancet* 388:891–897.
- 829 11. Krauer F, Riesen M, Reveiz L, Oladapo OT, Martínez-Vega R, Porgo T V., Haefliger A,  
830 Broutet NJ, Low N. 2017. Zika Virus Infection as a Cause of Congenital Brain  
831 Abnormalities and Guillain–Barré Syndrome: Systematic Review. *PLoS Med* 14:1–27.
- 832 12. Sarno M, Sacramento GA, Khouri R, do Rosario MS, Costa F, Archanjo G, Santos LA,  
833 Nery Jr. N, Vasilakis N, Ko AI, de Almeida AR. 2016. Zika Virus Infection and Stillbirths:  
834 A Case of Hydrops Fetalis, Hydranencephaly and Fetal Demise. *PLoS Negl Trop Dis*  
835 10:e0004517.
- 836 13. Mlakar J, Korva M, Tul N, Popovic M, Poljsak-Prijatelj M, Mraz J, Kolenc M, Resman Rus  
837 K, Vesnaver Vipotnik T, Fabjan Vodusek V, Vizjak A, Pizem J, Petrovec M, Avsic Zupanc  
838 T. 2016. Zika Virus Associated with Microcephaly. *N Engl J Med* 374:951–958.

- 839 14. Driggers RWW, Ho C-YY, Korhonen EMM, Kuivanen S, Jaaskelainen AJ, Smura T,  
840 Rosenberg A, Hill DAA, DeBiasi RLL, Vezina G, Timofeev J, Rodriguez FJJ, Levanov L,  
841 Razak J, Iyengar P, Hennenfent A, Kennedy R, Lanciotti R, du Plessis A, Vapalahti O,  
842 Jääskeläinen AJ, Smura T, Rosenberg A, Hill DAA, DeBiasi RLL, Vezina G, Timofeev J,  
843 Rodriguez FJJ, Levanov L, Razak J, Iyengar P, Hennenfent A, Kennedy R, Lanciotti R,  
844 du Plessis A, Vapalahti O. 2016. Zika Virus Infection with Prolonged Maternal Viremia  
845 and Fetal Brain Abnormalities. *N Engl J Med* 374:2142–2151.
- 846 15. Metsky HC, Matranga CB, Wohl S, Schaffner SF, Freije CA, Winnicki SM, West K, Qu J,  
847 Baniecki ML, Gladden-Young A, Lin AE, Tomkins-Tinch CH, Ye SH, Park DJ, Luo CY,  
848 Barnes KG, Shah RR, Chak B, Barbosa-Lima G, Delatorre E, Vieira YR, Paul LM, Tan  
849 AL, Barcellona CM, Porcelli MC, Vasquez C, Cannons AC, Cone MR, Hogan KN, Kopp  
850 EW, Anzinger JJ, Garcia KF, Parham LA, Ramirez RMG, Montoya MCM, Rojas DP,  
851 Brown CM, Hennigan S, Sabina B, Scotland S, Gangavarapu K, Grubaugh ND, Oliveira  
852 G, Robles-Sikisaka R, Rambaut A, Gehrke L, Smole S, Halloran ME, Villar L, Mattar S,  
853 Lorenzana I, Cerbino-Neto J, Valim C, Degraeve W, Bozza PT, Gnirke A, Andersen KG,  
854 Isern S, Michael SF, Bozza FA, Souza TML, Bosch I, Yozwiak NL, MacInnis BL, Sabeti  
855 PC. 2017. Zika virus evolution and spread in the Americas. *Nature* 546:411–415.
- 856 16. Tsetsarkin KA, Kenney H, Chen R, Liu G, Manukyan H, Whitehead SS, Laassri M,  
857 Chumakov K, Pletnev AG. 2016. A Full-Length Infectious cDNA Clone of Zika Virus from  
858 the 2015 Epidemic in Brazil as a Genetic Platform for Studies of Virus-Host Interactions  
859 and Vaccine Development. *MBio* 7.
- 860 17. Yuan L, Huang XY, Liu ZY, Zhang F, Zhu XL, Yu JY, Ji X, Xu YP, Li G, Li C, Wang HJ,  
861 Deng YQ, Wu M, Cheng ML, Ye Q, Xie DY, Li XF, Wang X, Shi W, Hu B, Shi PY, Xu Z,  
862 Qin CF. 2017. A single mutation in the prM protein of Zika virus contributes to fetal  
863 microcephaly. *Science* 358(6365):933-936.
- 864 18. Jaeger AS, Murrieta RA, Goren LR, Crooks CM, Moriarty V, Weiler AM, Rybarczyk S,

- 865 Semler MR, Id CH, Mejia A, Simmons HA, Id MF, Osorio E, Eickhoff JC, Connor SLO,  
866 Ebel GD, Friedrich C, Id MTA. 2019. Zika viruses of African and Asian lineages cause  
867 fetal harm in a mouse model of vertical transmission PLoS Negl Trop Dis : 13(4):  
868 e0007343. 1–18.
- 869 19. Shan C, Xia H, Haller SL, Azar SR, Liu Y, Liu J, Muruato AE, Chen R, Rossi SL,  
870 Wakamiya M, Vasilakis N, Pei R, Fontes-Garfias CR, Singh SK, Xie X, Weaver SC, Shi  
871 P-Y. 2020. A Zika virus envelope mutation preceding the 2015 epidemic enhances  
872 virulence and fitness for transmission. 2020. Proc Natl Acad Sci USA  
873 doi/10.1073/pnas.2005722117
- 874 20. Meaney-Delman D, Oduyebo T, Polen KN, White JL, Bingham AM, Slavinski SA,  
875 Heberlein-Larson L, St George K, Rakeman JL, Hills S, Olson CK, Adamski A, Culver  
876 Barlow L, Lee EH, Likos AM, Munoz JL, Petersen EE, Dufort EM, Dean AB, Cortese MM,  
877 Santiago GA, Bhatnagar J, Powers AM, Zaki S, Petersen LR, Jamieson DJ, Honein MA,  
878 Group USZPRPVW. 2016. Prolonged Detection of Zika Virus RNA in Pregnant Women.  
879 Obs Gynecol 128:724–730.
- 880 21. Akolekar R, Beta J, Picciarelli G, Ogilvie C, Antonio FD. Procedure-related risk of  
881 miscarriage following amniocentesis and chorionic villus sampling : a systematic review  
882 and meta-analysis. Ultrasound in Obstetrics and Gynecology (2015) 45(1) 16-26.
- 883 22. Nguyen SM, Antony KM, Dudley DM, Kohn S, Simmons HA, Wolfe B, Salamat MS,  
884 Teixeira LBC, Wiepz GJ, Thoong TH, Aliota MT, Weiler AM, Barry GL, Weisgrau KL,  
885 Vosler LJ, Mohns MS, Breitbach ME, Stewart LM, Rasheed MN, Newman CM, Graham  
886 ME, Wieben OE, Turski PA, Johnson KM, Post J, Hayes JM, Schultz-Darken N, Schotzko  
887 ML, Eudailey JA, Permar SR, Rakasz EG, Mohr EL, Capuano 3rd S, Tarantal AF, Osorio  
888 JE, O'Connor SL, Friedrich TC, O'Connor DH, Golos TG. 2017. Highly efficient maternal-  
889 fetal Zika virus transmission in pregnant rhesus macaques. PLoS Pathog 13:e1006378.
- 890 23. Coffey LL, Pesavento PA, Keesler RI, Singapuri A, Watanabe J, Watanabe R, et al. Zika

- 891 Virus Tissue and Blood Compartmentalization in Acute Infection of Rhesus Macaques.  
892 PLoS One. 2017;12: e0171148.
- 893 24. Coffey LL, Keesler RI, Pesavento PP, Woolard K, Singapuri A, Watanabe J, Cruzen C,  
894 Christe KL, Usachenko JU, Yee J, Heng VA, Bliss-Moreau E, Reader JR, von  
895 Morgenland W, Gibbons AM, Jackson K, Ardeshir A, Heimsath H, Permar SR,  
896 Senthamaraikannan P, Presicce P, Kallapur SG, Linnen JM, Gao K, Orr R, MacGill T,  
897 McClure M, McFarland R, Morrison JM, Van Rompay KKA. 2018. Intraamniotic Zika Virus  
898 Inoculation of Pregnant Rhesus Macaques Produces Fetal Neurologic Disease. Nat  
899 Commun (9) 2414
- 900 25. Dudley DM, van Rompay KK, Coffey LL, Ardeshir A, Keesler RI, Bliss-Moreau E, Grigsby  
901 PL, Steinbach RJ, Hirsch AJ, MacAllister RP, Pecoraro HL, Colgin LM, Hodge T,  
902 Streblow DN, Tardif S, Patterson JL, Tamhankar M, Seferovic M, Aagaard KM, Martín  
903 CSS, Chiu CY, Panganiban AT, Veazey RS, Wang X, Maness NJ, Gilbert MH, Bohm RP,  
904 Adams Waldorf KM, Gale M, Rajagopal L, Hotchkiss CE, Mohr EL, Capuano S V.,  
905 Simmons HA, Mejia A, Friedrich TC, Golos TG, O'Connor DH. 2018. Miscarriage and  
906 stillbirth following maternal Zika virus infection in nonhuman primates. Nat Med. 24:  
907 1104–1107.
- 908 26. Dudley DM, Aliota MT, Mohr EL, Weiler AM, Lehrer-Brey G, Weisgrau KL, Mohns MS,  
909 Breitbach ME, Rasheed MN, Newman CM, Gellerup DD, Moncla LH, Post J, Schultz-  
910 Darken N, Schotzko ML, Hayes JM, Eudailey JA, Moody MA, Permar SR, O'Connor SL,  
911 Rakasz EG, Simmons HA, Capuano S, Golos TG, Osorio JE, Friedrich TC, O'Connor  
912 DH. 2016. A rhesus macaque model of Asian-lineage Zika virus infection. Nat Commun  
913 7:12204.
- 914 27. Mohr EL, Block LN, Newman CM, Stewart LM, Koenig M, Semler M, Breitbach ME,  
915 Teixeira LBC, Zeng X, Weiler AM, Barry GL, Thoong TH, Wiepz GJ, Dudley DM,  
916 Simmons HA, Mejia A, Morgan TK, Salamat MS, Kohn S, Antony KM, Aliota MT, Mohns



- 917 MS, Hayes JM, Schultz-Darken N, Schotzko ML, Peterson E, Capuano 3rd S, Osorio JE,  
918 O'Connor SL, Friedrich TC, O'Connor DH, Golos TG. 2018. Ocular and uteroplacental  
919 pathology in a macaque pregnancy with congenital Zika virus infection. PLoS One  
920 13:e0190617.
- 921 28. Koide F, Goebel S, Snyder B, Walters KB, Gast A, Hagelin K, Kalkeri R, Rayner J. 2016.  
922 Development of a zika virus infection model in cynomolgus macaques. Front Microbiol  
923 7:1–8.
- 924 29. Osuna CE, Lim SY, Deleage C, Griffin BD, Stein D, Schroeder LT, Orange R, Best K,  
925 Luo M, Hraber PT, Andersen-Elyard H, Ojeda EF, Huang S, Vanlandingham DL, Higgs S,  
926 Perelson AS, Estes JD, Safronetz D, Lewis MG, Whitney JB. 2016. Zika viral dynamics  
927 and shedding in rhesus and cynomolgus macaques. Nat Med. (12):1448-1455.
- 928 30. Waldorf KMA, Nelson BR, Stencel-Baerenwald JE, Studholme C, Kapur RP, Armistead  
929 B, Walker CL, Merillat S, Vornhagen J, Tisoncik-Go J, Baldessari A, Coleman M, Dighe  
930 MK, Shaw DWWW, Roby JA, Santana-Ufret V, Boldenow E, Li J, Gao X, Davis MA,  
931 Swanstrom JA, Jensen K, Widman DG, Baric RS, Medwid JT, Hanley KA, Ogle J, Gough  
932 GM, Lee W, English C, Durning WMI, Thiel J, Gatenby C, Dewey EC, Fairgrieve MR,  
933 Hodge RD, Grant RF, Kuller L, Dobyns WB, Hevner RF, Gale M J, Rajagopal L, Adams  
934 Waldorf KM, Nelson BR, Stencel-Baerenwald JE, Studholme C, Kapur RP, Armistead B,  
935 Walker CL, Merillat S, Vornhagen J, Tisoncik-Go J, Baldessari A, Coleman M, Dighe MK,  
936 Shaw DWWW, Roby JA, Santana-Ufret V, Boldenow E, Li J, Gao X, Davis MA,  
937 Swanstrom JA, Jensen K, Widman DG, Baric RS, Medwid JT, Hanley KA, Ogle J, Gough  
938 GM, Lee W, English C, Durning WMI, Thiel J, Gatenby C, Dewey EC, Fairgrieve MR,  
939 Hodge RD, Grant RF, Kuller L, Dobyns WB, Hevner RF, Gale M, Rajagopal L. 2018.  
940 Congenital Zika virus infection as a silent pathology with loss of neurogenic output in the  
941 fetal brain. Nat Med. 2016;22: 1256–1259.
- 942 31. Adams Waldorf KM, Stencel-Baerenwald JE, Kapur RPR, Studholme C, Boldenow E,

- 943 Vornhagen J, Baldessari A, Dighe MK, Thiel J, Merillat S, Armistead B, Tisoncik-Go J,  
944 Green RGR, Davis MA, Dewey EC, Fairgrieve MR, Gatenby JC, Richards T, Garden GA,  
945 Diamond MSM, Juul SES, Grant RF, Kuller L, Shaw DWWW, Ogle J, Gough GM, Lee W,  
946 English C, Hevner RF, Dobyns WB, Gale Jr M, Rajagopal L, Gale M, Rajagopal L. 2016.  
947 Fetal brain lesions after subcutaneous inoculation of Zika virus in a pregnant nonhuman  
948 primate. *Nat Med* 22:1256–1259.
- 949 32. Aid M, Abbink P, Larocca RA, Boyd M, Nityanandam R, Nanayakkara O, Martinot AJ,  
950 Moseley ET, Blass E, Borducchi EN, Chandrashekar A, Brinkman AL, Molloy K, Jetton D,  
951 Tartaglia LJ, Liu J, Best K, Perelson AS, De La Barrera RA, Lewis MG, Barouch DH.  
952 2017. Zika Virus Persistence in the Central Nervous System and Lymph Nodes of  
953 Rhesus Monkeys. *Cell* 169:610-620.e14.
- 954 33. Hirsch AJ, Smith JL, Haese NN, Broeckel RM, Parkins CJ, Kreklywich C, DeFilippis VR,  
955 Denton M, Smith PP, Messer WB, Colgin LMA, Ducore RM, Grigsby PL, Hennebold JD,  
956 Swanson T, Legasse AW, Axthelm MK, MacAllister R, Wiley CA, Nelson JA, Streblow  
957 DN. 2017. Zika Virus infection of rhesus macaques leads to viral persistence in multiple  
958 tissues. *PLoS Pathog* 13:1–23.
- 959 34. Van Rompay KKA, Keesler RI, Ardeshir A, Watanabe J, Usachenko J, Singapuri A,  
960 Cruzen C, Bliss-Moreau E, Murphy AM, Yee JL, Webster H, Dennis M, Singh T,  
961 Heimsath H, Lemos D, Stuart J, Morabito KM, Foreman BM, Burgomaster KE, Noe AT,  
962 Dowd KA, Ball E, Woolard K, Presicce P, Kallapur SG, Permar SR, Foulds KE, Coffey LL,  
963 Pierson TC, Graham BS. 2019. DNA vaccination before conception protects Zika virus-  
964 exposed pregnant macaques against prolonged viremia and improves fetal outcomes. *Sci*  
965 *Transl Med* 11:1–12.
- 966 35. Van Rompay KKA, Keesler RI, Ardeshir A, Watanabe J, Usachenko J, Singapuri A,  
967 Cruzen C, Bliss-Moreau E, Murphy AM, Yee JAL, Webster H, Dennis M, Singh T,  
968 Heimsath H, Lemos D, Stuart J, Morabito KM, Foreman BM, Burgomaster KE, Noe AT,

- 969 Dowd KA, Ball E, Woolard K, Presicce P, Kallapur SG, Permar SR, Foulds KE, Coffey LL,  
970 Pierson TC, Graham BS. 2019. DNA vaccination before conception protects Zika virus–  
971 exposed pregnant macaques against prolonged viremia and improves fetal outcomes. *Sci*  
972 *Transl Med*. doi:10.1126/scitranslmed.aay2736
- 973 36. Brown RJ, Peters PJ, Caron C, Gonzalez-Perez MP, Stones L, Ankghuambom C, Pondei  
974 K, McClure CP, Alemnji G, Taylor S, Sharp PM, Clapham PR, Ball JK. 2011.  
975 Intercompartmental recombination of HIV-1 contributes to env intrahost diversity and  
976 modulates viral tropism and sensitivity to entry inhibitors. *J Virol* 85:6024–6037.
- 977 37. Frost SD, Wrin T, Smith DM, Kosakovsky Pond SL, Liu Y, Paxinos E, Chappey C,  
978 Galovich J, Beauchaine J, Petropoulos CJ, Little SJ, Richman DD. 2005. Neutralizing  
979 antibody responses drive the evolution of human immunodeficiency virus type 1 envelope  
980 during recent HIV infection. *Proc Natl Acad Sci U S A* 102:18514–18519.
- 981 38. Leslie AJ, Pfafferott KJ, Chetty P, Draenert R, Addo MM, Feeney M, Tang Y, Holmes EC,  
982 Allen T, Prado JG, Altfeld M, Brander C, Dixon C, Ramduth D, Jeena P, Thomas SA, St  
983 John A, Roach TA, Kupfer B, Luzzi G, Edwards A, Taylor G, Lyall H, Tudor-Williams G,  
984 Novelli V, Martinez-Picado J, Kiepiela P, Walker BD, Goulder PJ. 2004. HIV evolution:  
985 CTL escape mutation and reversion after transmission. *Nat Med* 10:282–289.
- 986 39. Vignuzzi M, Stone JK, Arnold JJ, Cameron CE, Andino R. 2006. Quasispecies diversity  
987 determines pathogenesis through cooperative interactions in a viral population.  
988 *Nature* 2005/12/06. 439:344–348.
- 989 40. Borucki MK, Allen JE, Chen-Harris H, Zemla A, Vanier G, Mabery S, Torres C, Hullinger  
990 P, Slezak T. 2013. The role of viral population diversity in adaptation of bovine  
991 coronavirus to new host environments. *PLoS One* 8:e52752.
- 992 41. Nora T, Bouchonnet F, Labrosse B, Charpentier C, Mammano F, Clavel F, Hance AJ.  
993 2008. Functional diversity of HIV-1 envelope proteins expressed by contemporaneous  
994 plasma viruses. *Retrovirology* 5:23.

- 995 42. Memoli MJ, Bristol T, Proudfoot KE, Davis AS, Dunham EJ, Taubenberger JK. 2012. In  
996 vivo evaluation of pathogenicity and transmissibility of influenza A(H1N1)pdm09  
997 hemagglutinin receptor binding domain 222 intrahost variants isolated from a single  
998 immunocompromised patient. *Virology* 428:21–29.
- 999 43. Domingo E, Gomez J. 2007. Quasispecies and its impact on viral hepatitis. *Virus Res*  
1000 127:131–150.
- 1001 44. Debbink K, Lindesmith LC, Donaldson EF, Swanstrom J, Baric RS. 2014. Chimeric GII.4  
1002 norovirus virus-like-particle-based vaccines induce broadly blocking immune responses. *J*  
1003 *Virology* 88:7256–7266.
- 1004 45. Norstrom MM, Buggert M, Tauriainen J, Hartogensis W, Prosperi MC, Wallet MA, Hecht  
1005 FM, Salemi M, Karlsson AC. 2012. Combination of immune and viral factors distinguishes  
1006 low-risk versus high-risk HIV-1 disease progression in HLA-B\*5701 subjects. *J Virol*  
1007 86:9802–9816.
- 1008 46. Caporale M, Di Gialleonardo L, Janowicz A, Wilkie G, Shaw A, Savini G, Van Rijn PA,  
1009 Mertens P, Di Ventura M, Palmarini M. 2014. Virus and host factors affecting the clinical  
1010 outcome of bluetongue virus infection. *J Virol* 88:10399–10411.
- 1011 47. Riemersma KK, Steiner C, Singapuri A, Coffey LL. Chikungunya Virus Fidelity Variants  
1012 Exhibit Differential Attenuation and Population Diversity in Cell Culture and Mice. *J Virol.*  
1013 2019;93: 1–19.
- 1014 48. Riemersma KK, Coffey LL. 2019. Chikungunya virus populations experience diversity-  
1015 dependent attenuation and purifying intra-vector selection in Californian *Aedes aegypti*  
1016 mosquitoes. *PLoS Negl Trop Dis.* 2019. doi:10.1371/journal.pntd.0007853
- 1017 49. Coffey LL, Beeharry Y, Borderia A V, Blanc H, Vignuzzi M. 2011. Arbovirus high fidelity  
1018 variant loses fitness in mosquitoes and mice. *Proc Natl Acad Sci U S A* 2011/09/08.  
1019 108:16038–16043.
- 1020 50. Rozen-Gagnon K, Stapleford KA, Mongelli V, Blanc H, Failloux AB, Saleh MC, Vignuzzi

- 1021 M. 2014. Alphavirus mutator variants present host-specific defects and attenuation in  
1022 Mammalian and insect models. *PLoS Pathog*2014/01/24. 10:e1003877.
- 1023 51. Magnani DM, Rogers TF, Maness NJ, Grubaugh ND, Beutler N, Bailey VK, Gonzalez-  
1024 Nieto L, Gutman MJ, Pedreño-Lopez N, Kwal JM, Ricciardi MJ, Myers TA, Julander JG,  
1025 Bohm RP, Gilbert MH, Schiro F, Aye PP, Blair R V., Martins MA, Falkenstein KP, Kaur A,  
1026 Curry CL, Kallas EG, Desrosiers RC, Goldschmidt-Clermont PJ, Whitehead SS,  
1027 Andersen KG, Bonaldo MC, Lackner AA, Panganiban AT, Burton DR, Watkins DI. 2018.  
1028 Fetal demise and failed antibody therapy during Zika virus infection of pregnant  
1029 macaques. *Nat Commun* 9:1–8.
- 1030 52. Pfeiffer F, Gröber C, Blank M, Händler K, Beyer M, Schultze JL, Mayer G. 2018.  
1031 Systematic evaluation of error rates and causes in short samples in next-generation  
1032 sequencing. *Sci Rep.* 8(1)
- 1033 53. Vermillion MS, Lei J, Shabi Y, Baxter VK, Crilly NP, McLane M, Griffin DE, Pekosz A,  
1034 Klein SL, Burd I. 2017. Intrauterine Zika virus infection of pregnant immunocompetent  
1035 mice models transplacental transmission and adverse perinatal outcomes. *Nat Commun*  
1036 8:14575.
- 1037 54. Weger-Lucarelli J, Rückert C, Chotiwan N, Nguyen C, Garcia Luna SM, Fauver JR, Foy  
1038 BD, Perera R, Black WC, Kading RC, Ebel GD. 2016. Vector Competence of American  
1039 Mosquitoes for Three Strains of Zika Virus. *PLoS Negl Trop Dis* 10:1–16.
- 1040 55. Cao B, Diamond MS, Mysorekar IU. 2017. Maternal-fetal transmission of zika virus:  
1041 Routes and signals for infection. *J Interf Cytokine Res.* doi:10.1089/jir.2017.0011
- 1042 56. Tabata T, Pettitt M, Puerta-Guardo H, Michlmayr D, Wang C, Fang-Hoover J, Harris E,  
1043 Pereira L. 2016. Zika Virus Targets Different Primary Human Placental Cells, Suggesting  
1044 Two Routes for Vertical Transmission. *Cell Host Microbe* 20:155–166.
- 1045 57. Miner JJ, Diamond MS. 2017. Zika Virus Pathogenesis and Tissue Tropism. *Cell Host*  
1046 *Microbe.* doi:10.1016/j.chom.2017.01.004

- 1047 58. Russo FB, Jungmann P, Beltrão-Braga PCB. 2017. Zika infection and the development of  
1048 neurological defects. *Cell Microbiol.* doi:10.1111/cmi.12744
- 1049 59. CDC. 2016. Vital Signs: Preparing for Local Mosquito-Borne Transmission of Zika Virus -  
1050 United States, 2016. *MMWR Morb Mortal Wkly Rep* 65:352.
- 1051 60. Li X-D, Deng C-L, Ye H-Q, Zhang H-L, Zhang Q-Y, Chen D-D, Zhang P-T, Shi P-Y, Yuan  
1052 Z-M, Zhang B. 2016. Transmembrane Domains of NS2B Contribute to both Viral RNA  
1053 Replication and Particle Formation in Japanese Encephalitis Virus. *J Virol.* 90(12):5735-  
1054 5749.
- 1055 61. Li Y, Li Q, Wong YL, Liew LSY, Kang C. 2015. Membrane topology of NS2B of dengue  
1056 virus revealed by NMR spectroscopy. *Biochim Biophys Acta - Biomembr.*  
1057 (1848)10A:2244-2252.
- 1058 62. Chambers TJ, Nestorowicz A, Amberg SM, Rice CM. 1993. Mutagenesis of the yellow  
1059 fever virus NS2B protein: effects on proteolytic processing, NS2B-NS3 complex  
1060 formation, and viral replication. *J Virol.* 67(11): 6797–6807
- 1061 63. Grubaugh ND, Petrone ME, Holmes EC. 2020. We shouldn't worry when a virus mutates  
1062 during disease outbreaks. *Nat Microbiol.* 5: 529–530.
- 1063 64. Lanciotti RS, Kosoy OL, Laven JJ, Velez JO, Lambert AJ, Johnson AJ, Stanfield SM,  
1064 Duffy MR. 2008. Genetic and serologic properties of Zika virus associated with an  
1065 epidemic, Yap State, Micronesia, 2007. 2008. *Emerg Infect Dis.* 14:1232–1239.
- 1066 65. Deng X, Achari A, Federman S, Yu G, Somasekar S, Bártolo I, Yagi S, Mbala-Kingebeni  
1067 P, Kapetshi J, Ahuka-Mundeke S, Muyembe-Tamfum JJ, Ahmed AA, Ganesh V,  
1068 Tamhankar M, Patterson JL, Ndemi N, Mbanya D, Kaptue L, McArthur C, Muñoz-  
1069 Medina JE, Gonzalez-Bonilla CR, López S, Arias CF, Arevalo S, Miller S, Stone M, Busch  
1070 M, Hsieh K, Messenger S, Wadford DA, Rodgers M, Cloherty G, Faria NR, Thézé J,  
1071 Pybus OG, Neto Z, Morais J, Taveira N, R. Hackett J, Chiu CY. 2020. Metagenomic  
1072 sequencing with spiked primer enrichment for viral diagnostics and genomic surveillance.

- 1073 Nat Microbiol. 5: 443–454.
- 1074 66. Borucki MK, Collette NM, Coffey LL, Van Rompay KKA, Hwang MH, Thissen JB, Allen  
1075 JE, Zemla AT. 2019. Multiscale analysis for patterns of Zika virus genotype emergence,  
1076 spread, and consequence. PLoS One. 14(12): e0225699.
- 1077 67. Grubaugh ND, Gangavarapu K, Quick J, Matteson NL, Jesus JG De, Main BJ, Tan AL,  
1078 Paul LM, Brackney DE, Grewal S, Gurfield N, Rompay KKA Van, Isern S, Michael SF,  
1079 Coffey LL, Loman NJ, Andersen KG. 2019. An amplicon-based sequencing framework for  
1080 accurately measuring intrahost virus diversity using PrimalSeq and iVar 1–19.
- 1081 68. Quick J, Grubaugh ND, Pullan ST, Claro IM, Smith AD, Gangavarapu K, Oliveira G,  
1082 Robles-Sikisaka R, Rogers TF, Beutler NA, Burton DR, Lewis-Ximenez LL, De Jesus JG,  
1083 Giovanetti M, Hill SC, Black A, Bedford T, Carroll MW, Nunes M, Alcantara LC, Sabino  
1084 EC, Baylis SA, Faria NR, Loose M, Simpson JT, Pybus OG, Andersen KG, Loman NJ.  
1085 2017. Multiplex PCR method for MinION and Illumina sequencing of Zika and other virus  
1086 genomes directly from clinical samples. Nat Protoc.
- 1087 69. Li H. 2013. Aligning sequence reads, clone sequences and assembly contigs with BWA-  
1088 MEM.
- 1089 70. Li H. 2011. A statistical framework for SNP calling, mutation discovery, association  
1090 mapping and population genetical parameter estimation from sequencing data.  
1091 Bioinformatics 27:2987–2993.  
1092
